1 **Predicting the presence and abundance of bacterial taxa in**  
2 **environmental communities through flow cytometric**  
3 **fingerprinting**

4 Jasmine Heyse<sup>a</sup>, Florian Schattenberg<sup>b</sup>, Peter Rubbens<sup>c</sup>, Susann Müller<sup>b</sup>, Willem  
5 Waegeman<sup>d</sup>, Nico Boon<sup>a #</sup>, Ruben Props<sup>a</sup>

6 <sup>a</sup> Center for Microbial Ecology and Technology (CMET), Department of Biochemical and Microbial  
7 Technology, Ghent University, Coupure Links 653, B-9000 Gent, Belgium

8 <sup>b</sup> Department of Environmental Microbiology, Helmholtz Centre for Environmental Research-UFZ,  
9 Leipzig, Germany

10 <sup>c</sup> Flanders Marine Institute (VLIZ), InnovOcean site - Wandelaarkaai 7, B-8400 Ostend, Belgium

11 <sup>d</sup> KERMIT, Department of Data Analysis and Mathematical Modelling, Ghent University, Coupure Links  
12 653, B-9000 Gent, Belgium

13 **Running title**

14 Linking flow cytometric fingerprints with taxonomy

15 **Keywords**

16 Flow cytometry, 16S rRNA gene amplicon sequencing, Cell sorting, Machine learning,  
17 Monitoring, Microbial community dynamics, Aquaculture

18 # Correspondence to: Nico Boon, Ghent University; Faculty of Bioscience Engineering;  
19 Centre of Microbial Ecology and Technology (CMET); Coupure Links 653; B-9000 Gent,  
20 Belgium; phone: +32 (0)9 264 59 76; fax: +32 (0)9 264 62 48; E-mail:  
21 Nico.Boon@UGent.be; Webpage: [www.cmet.ugent.be](http://www.cmet.ugent.be).

## 22 **Abstract**

23 Microbiome management research and applications rely on temporally-resolved  
24 measurements of community composition. Current technologies to assess community  
25 composition either make use of cultivation or sequencing of genomic material, which  
26 can become time consuming and/or laborious in case high-throughput measurements  
27 are required. Here, using data from a shrimp hatchery as an economically relevant case  
28 study, we combined 16S rRNA gene amplicon sequencing and flow cytometry data to  
29 develop a computational workflow that allows the prediction of taxon abundances  
30 based on flow cytometry measurements. The first stage of our pipeline consists of a  
31 classifier to predict the presence or absence of the taxon of interest, with yields an  
32 average accuracy of  $88.13 \pm 4.78$  % across the top 50 OTUs of our dataset. In the second  
33 stage, this classifier was combined with a regression model to predict the relative  
34 abundances of the taxon of interest, which yields an average  $R^2$  of  $0.35 \pm 0.24$  across the  
35 top 50 OTUs of our dataset. Application of the models on flow cytometry time series  
36 data showed that the generated models can predict the temporal dynamics of a large  
37 fraction of the investigated taxa. Using cell-sorting we validated that the model correctly  
38 associates taxa to regions in the cytometric fingerprint where they are detected using  
39 16S rRNA gene amplicon sequencing. Finally, we applied the approach of our pipeline  
40 on two other datasets of microbial ecosystems. This pipeline represents an addition to  
41 the expanding toolbox for flow cytometry-based monitoring of bacterial communities  
42 and complements the current plating- and marker gene-based methods.

## 43 **Importance**

44 Monitoring of microbial community composition is crucial for both microbiome  
45 management research and applications. Existing technologies, such as plating and  
46 amplicon sequencing, can become laborious and expensive when high-throughput  
47 measurements are required. Over the recent years, flow cytometry-based  
48 measurements of community diversity have been shown to correlate well to those  
49 derived from 16S rRNA gene amplicon sequencing in several aquatic ecosystems,  
50 suggesting there is a link between the taxonomic community composition and  
51 phenotypic properties as derived through flow cytometry. Here, we further integrated  
52 16S rRNA gene amplicon sequencing and flow cytometry survey data in order to  
53 construct models that enable the prediction of both the presence and the abundance of  
54 individual bacterial taxa in mixed communities using flow cytometric fingerprinting.  
55 The developed pipeline holds great potential to be integrated in routine monitoring  
56 schemes and early warning systems for biotechnological applications.

## 57 **Introduction**

58 Bacterial communities are complex and highly dynamic associations that play  
59 important roles in many biotechnological applications. One issue that hinders efforts to  
60 study and manage these communities, is the fact that existing technologies to assess  
61 community composition either rely on cultivation or necessitate the extraction and  
62 sequencing of genomic material, both of which are time consuming and laborious. As a  
63 result, the availability of fine-scale resolution data on bacterial community dynamics is  
64 still limited in many fields. One example hereof is the aquaculture sector (Wang *et al.*,  
65 2020), where the development of effective management strategies to reduce the  
66 occurrence of diseases is hampered by the limited knowledge on the microbial ecology  
67 of these systems. Additionally, routine monitoring schemes in aquaculture farms are  
68 still mainly relying on (selective) plating, which prohibits accurate description of  
69 general dysbiotic states and specific disease outbreaks.

70 Flow cytometry (FCM) is a single-cell technique that is increasingly used as a fast and  
71 inexpensive tool for characterising microbial communities in a wide variety of fields,  
72 including drinking water production and distribution (Besmer and Hammes, 2016;  
73 Buysschaert, Vermijs, *et al.*, 2018; Favere *et al.*, 2020), surveys of natural ecosystems  
74 (Ferrera *et al.*, 2015; Read *et al.*, 2015; Santos *et al.*, 2019; Giljan *et al.*, 2020),  
75 aquaculture (Lucas *et al.*, 2010) and fermentation (Salma *et al.*, 2013; Narayana *et al.*,  
76 2020). Over the last decade, through the development of advanced data-analysis  
77 pipelines, the application of FCM has moved beyond its initial purpose of estimating cell  
78 densities (Rubbens and Props, 2021). These computational advances include a range of  
79 fingerprinting pipelines (Koch, Fetzner, Harms, and Muller, 2013; Koch, Fetzner, Schmidt,  
80 *et al.*, 2013), algorithms for estimating community stability (Liu *et al.*, 2018) and

81 algorithms for estimating community diversity metrics (Props *et al.*, 2016). Flow  
82 cytometry-derived diversity metrics have been shown to be highly correlated to those  
83 derived from 16S rRNA gene amplicon sequencing in some ecosystems (García *et al.*,  
84 2015; Props *et al.*, 2016, 2018; Rubbens *et al.*, 2021), suggesting there is a link between  
85 the taxonomic community composition and phenotypic properties as derived through  
86 FCM. This observation is supported by the fact that sorted fractions of a community  
87 have different taxonomic compositions compared to the entire community (Vogt *et al.*,  
88 2009; Zimmermann *et al.*, 2016; Lambrecht *et al.*, 2019; Liu *et al.*, 2019; Haange *et al.*,  
89 2020).

90 Using machine learning techniques, Bowman *et al.* (2017) and Rubbens, Schmidt, *et al.*  
91 (2019) showed that the relative abundance of specific OTUs is predictive for the  
92 abundance of high nucleic acid (HNA) and low nucleic acid (LNA) sub-communities in  
93 FCM data of natural ecosystems, illustrating the possibility of linking specific regions in  
94 the cytometric fingerprint to taxonomic groups using modelling approaches. Several  
95 studies have sought to further exploit this relationship in order to build predictive  
96 models for taxonomic community composition based on FCM data. Most of these studies  
97 take a bottom-up approach in which they train predictive models on data of axenic  
98 bacterial cultures. Rubbens *et al.* (2017) introduced the use of *in silico* communities  
99 based on axenic culture data, while Özel Duygan *et al.* (2020) developed a pipeline that  
100 allows to classify mixed communities into classes of predefined “cell types” by  
101 comparing data to signatures of a set of strains and bead standards. However,  
102 cytometric fingerprints of axenic cultures are known to be dynamic over time, for  
103 example in function of growth stage (Müller, 2007; Neumeyer *et al.*, 2012; Buysschaert,  
104 Kerckhof, *et al.*, 2018). Additionally, we have recently shown that the single-cell

105 properties of an individual taxon, as measured by FCM, depend on the presence of other  
106 bacterial taxa in the community. Therefore, training models on axenic culture data may  
107 lead to unreliable predictions (Heyse *et al.*, 2019).

108 In this study, we aimed to further integrate 16S rRNA gene amplicon sequencing and  
109 flow cytometry survey data in order to construct models that enable the prediction of  
110 both the presence and the abundance of multiple individual bacterial taxa in mixed  
111 communities using flow cytometric fingerprinting (Figure 1). As a case study, we used  
112 samples taken from a whiteleg shrimp (*Litopenaeus vannamei*) hatchery of which the  
113 dynamics have been previously described (Heyse *et al.*, 2021). We first verified the  
114 taxonomic stratification in the cytometric fingerprints using cell sorting. We then  
115 developed a two-stage pipeline using flow cytometry data as input that, firstly, predicts  
116 the presence/absence of bacterial taxa, and, secondly, predicts the relative abundance  
117 of bacterial taxa. Through the direct linking of flow cytometry and amplicon sequencing  
118 survey data, the constructed models are not relying on data from axenic cultures. We  
119 verified the ability of the models to assign taxa to the specific regions in the cytometric  
120 fingerprint using marker gene data from the cell sorted community fractions and using  
121 a three strain mock community. Finally, we validated the approach of our pipeline on  
122 two independent datasets.

## 123 **Results**

124 In this study, we used published flow cytometry and 16S rRNA gene amplicon data from  
125 an 18-day sampling campaign in a *L. vannamei* hatchery where five replicate  
126 cultivations were studied (Heyse *et al.*, 2021). The replicate cultivation tanks were  
127 sampled at a resolution of 3 hours for flow cytometry and once per day for 16S rRNA  
128 gene sequencing. This dataset was combined with newly-generated 16S rRNA gene  
129 amplicon data on sorted fractions of samples originating from this previous study.

### 130 **Taxonomic information is conserved in flow cytometric fingerprints**

131 Prior to model training, the connection between the taxonomic composition of the  
132 bacterial communities, as derived through 16S rRNA gene amplicon sequencing, and  
133 their phenotypic properties, as derived by flow cytometry, was evaluated using cell  
134 sorting. In total, 57 community fractions were sorted from 20 samples using 5 gates  
135 (referred to as “sub-community” or “SC” 1 to 5). The sorted regions in the flow  
136 cytometry data space (i.e. gates) were chosen to maximize the coverage of the  
137 community across the side scatter and SYBR Green I fluorescence range  
138 (Supplementary Figure 1), and represented sub-communities with relative cell  
139 abundances between 3 to 56 % of the total cell gate (Figure 2A).

140 For all sub-communities, the taxonomic richness was significantly lower as compared to  
141 that of the cell gate (one-sided Wilcoxon rank sum test,  $p < 0.0001$ , Figure 2B). The  
142 taxonomic composition of each of the five gated sub-communities was significantly  
143 different from that of the cell gate as well as from each other (PERMANOVA on Bray-  
144 Curtis dissimilarities,  $p < 0.01$ , Supplementary Table 1, Supplementary Figure 1). Each  
145 sub-community was enriched in specific taxa and shared a limited number of taxa with

146 the other sub-communities (Figure 2C). Many taxa were uniquely detected in a specific  
147 sub-community (e.g. OTU1 *Phaeodactylibacter* sp. in SC 1), however, some taxa were  
148 detected in two (e.g. OTU3 *Nioella* sp. in SC 1 and 2) or three (e.g. OTU7 *Kordia* sp. in SC  
149 1, 2 and 3) sub-communities (Figure 2C, Supplementary Figure 2). The overlap in  
150 taxonomic composition between gates that were more dissimilar from each other was  
151 smaller (e.g. SC 1 and 5, which are more dissimilar, only share 15 OTUs, while SC 1 and  
152 2, which are close to each other, have 147 OTUs in common; Figure 2C), confirming that  
153 specific taxa typically occur in the specific positions of the cytometric space.

154 The two most narrowly defined sub-communities (i.e. SC 3 and 5), with the lowest  
155 abundance in the community, represented sub-communities with low taxonomic  
156 diversity and were nearly mono-dominant, (i.e. *Kordia* sp. in SC 3 and unclassified  
157 *Alphaproteobacteria* sp. in SC 5), while the larger and abundant gates (i.e. SC 1, 2 and 4)  
158 were dominated by multiple taxa (Supplementary Figure 2). It should be noted that the  
159 number of sorted samples were not equally distributed over the five sorting gates (i.e.  
160 SC3 and 5 was sorted once and three times, respectively, while SC1, 2 and 4 were sorted  
161 15, 17 and 18 times), which may have caused the cumulative number of observed taxa  
162 in SC3 and 5 to be lower than those of SC1, 2 and 4. Nevertheless, also the average  
163 number of taxa per sample was lower in SC3 and 5 as compared to SC1, 2 and 4 (Figure  
164 2B).

165 Throughout the shrimp cultivation, the phylogenetic composition in the sub-  
166 communities was preserved well, even though the composition of the total community  
167 was dynamic over time and differed between the replicate tanks from which samples  
168 were sorted.

## 169 **Development of a pipeline to extract taxonomic information**



170 Cell sorting was performed on a different instrument (BD Influx) as compared to the  
171 FCM measurements of community samples (BD FACSVerse). To be able to use both the  
172 community sample and the sorted sample data as a single dataset, a set of  
173 representative samples was measured on both instruments, the gates that were used  
174 for sorting were manually-recreated on the FACSVerse data and correspondence  
175 between the relative cell abundances in the gates on data of the two instruments was  
176 used to evaluate the quality of the manually recreated gates (Supplementary Figure 1).  
177 The corresponding flow cytometric fingerprints of the sorted sub-communities were  
178 obtained from the community measurements using these gates. The combined dataset  
179 (i.e. including both sorted and community measurements) consisted of 169 samples for  
180 which both 16S rRNA gene amplicon and flow cytometry data were available. Models  
181 were trained for each OTU individually, using the flow cytometry data as input and the  
182 presence or abundance of the OTU of interest as model output. Details about the model  
183 construction are provided in the Materials and Methods sections. Performances for the  
184 top 50 OTUs from the aquaculture dataset were evaluated. All reported performance  
185 values are performances on the validation sets (i.e. on data that was not used for model  
186 training).

187 In the first part of the pipeline, a presence/absence classifier is trained. Classification  
188 performance was evaluated using accuracy (i.e. percentage correctly predicted  
189 samples) and AUC (area under the ROC curve, i.e. probability that a randomly-chosen  
190 sample where the taxon is “present” is assigned a higher probability for “present” than a  
191 randomly-chosen sample where the taxon is “absent”). We were able to perform  
192 presence/absence classification with high accuracies, ranging from 78 % to 98 % for  
193 individual OTUs and AUC values between 0.66 and 0.99 (Figure 3A and B). The number

194 of false positive (i.e. taxon is incorrectly predicted to be present) and false negative (i.e.  
195 taxon is incorrectly predicted to be absent) samples did not differ strongly for  
196 individual OTUs (two-sided Wilcoxon rank sum test,  $p > 0.05$ , Supplementary Figure 3).

197 In the second part of the pipeline, the relative abundances of individual taxa were  
198 modelled using a regression ensemble. Regression performance was evaluated using  $R^2$   
199 (i.e. proportion of the variance in the relative abundance values that can be predicted  
200 from the flow cytometry data) and MAE (mean average error, i.e. average deviation  
201 between true and predicted relative abundances). The regression ensembles had  $R^2$ -  
202 values between 0.00 and 0.64 ( $0.21 \pm 0.18$  on average) and MAE (Mean Absolute Error)  
203 values between 0.24 and 9.06 ( $3.41 \pm 2.19$  on average) (blue dots in Figure 3). The  
204 regression ensembles frequently predicted high relative OTU abundances for samples  
205 where an OTU was either absent or present in very low abundance (Supplementary  
206 Figure 4B). Therefore the predictions of the classifier were superimposed on the  
207 regression predictions (Supplementary Figure 4A): the predicted relative OTU  
208 abundances in samples that were classified as “absent” were set to zero, predictions for  
209 samples where the OTU was predicted to be “present” remain unchanged. This reduced  
210 the number of false positive samples by an average of 10 fold (i.e. from  $40 \pm 17$  to  $4 \pm 3$   
211 out of 100 samples). However, superimposing the classifier to the regression results  
212 slightly increased the number of false negative samples from  $3 \pm 3$  out of 100 samples to  
213  $8 \pm 5$  on average. Overall, the  $R^2$ -values were increased to  $0.35 \pm 0.24$  on average  
214 (ranging between 0.00 and 0.81), and the MAE was reduced to  $1.31 \pm 0.97$  on average  
215 (green dots in Figure 3).

216 To evaluate the ability of our approach to correctly capture dynamics of taxa over time,  
217 we predicted the presence and relative abundances of four taxa on the time points for

218 which no amplicon data were available. Additionally, we calculated the predicted  
219 absolute OTU abundances by multiplying bacterial densities with the predicted relative  
220 OTU abundances. The taxa were selected based on a good (OTU1,  $R^2 = 0.81$ ),  
221 intermediate (OTU2,  $R^2 = 0.65$  and OTU6,  $R^2 = 0.19$ ) and low (OTU13,  $R^2 = 0.03$ ) overall  
222 prediction performance. For OTU1, the predictions followed the overall patterns that  
223 were estimated by interpolation of the time points for which amplicon data was  
224 available (Figure 4). Additionally, the predictions for which the abundances did not  
225 match the trends that were estimated by interpolation, often coincided with low  
226 absolute abundances. Similarly, for OTU2 and OTU6, which had intermediate model  
227 performances, the abundance patterns were following the expected trends well  
228 (Supplementary Figure 5, Supplementary Figure 6). For OTU13, which had the lowest  
229 performance, the patterns were not corresponding to those that would be expected  
230 based on interpolation of the available data points (Supplementary Figure 7).

231 Since the models were trained on survey data, in which there may be co-occurrence  
232 between taxa, predictions of individual OTUs may be (partly) relying on detecting co-  
233 occurring OTUs and not the OTU of interest itself. In that case, the applicability of the  
234 pipeline may be limited to filling gaps in time series of the dataset that was used for  
235 model training (i.e. relying on auto-correlation between the samples over time), but the  
236 reliability of predictions on independently generated time series of the same  
237 environment (e.g. repeated shrimp cultivation in this case) may be limited. To verify the  
238 impact of co-occurrence, we compared the performances of models that were trained  
239 on only four of the replicate tanks and predictions were made on the 5<sup>th</sup> tank (setting 1)  
240 with models that were trained using a randomly chosen training- and validation set  
241 from data of all replicate tanks (setting 2). The former ensured that the co-occurrence

242 patterns of the validation data (i.e. data from the 5<sup>th</sup> tank) were not incorporated during  
243 model training, while the latter incorporated a all co-occurrence patterns during model  
244 training. There was an average decrease in  $R^2$  of 0.02 across the 50 OTUs in setting 2  
245 relative to setting 1. This small decrease suggests that co-occurrence has only a minor  
246 influence on model performance. To investigate this further, we assessed, for the top 10  
247 OTUs, the feature importance of the clusters in the cytometric fingerprint (see Materials  
248 and Methods for procedure) with the regions of the sorting gates in which these taxa  
249 were observed. Overall, the positions of clusters with high feature importances were  
250 corresponding well to the positions of the gates in which these taxa were observed, with  
251 the exception of OTU6, for which clusters were detected over the entire range of the  
252 bacterial community fingerprint (Supplementary Figure 8). For some OTUs there were  
253 small deviations, which may be the result of technical aspects. For example, some OTUs  
254 were not detected in regions with high feature importances, which may be the result of  
255 the limited number of sorted samples and the fact that these were biased towards only  
256 3 tanks during the first half of the sampling campaign (i.e. day 4-13). Secondly, the  
257 sorting gates were recreated from the data of one instrument to the other (see Materials  
258 and Methods, Supplementary Figure 1). This may have caused gates immediately  
259 adjacent to the sub-communities to be either marked or not marked while this was not  
260 the case. Overall, these results show that the models can robustly associate taxa to  
261 regions in the cytometric fingerprint where they are detected using 16S rRNA gene  
262 amplicon sequencing, and, hence they are not relying heavily on co-occurrence patterns.

263 To test whether taxa that are phylogenetically closely related are more likely to be  
264 associated to the same regions in the cytometric fingerprints, the relationship between  
265 phylogenetic distance between taxa and feature importance similarity was evaluated.

266 There was a significant (Adj. R. sq. = 0.039 and  $p < 2e-16$ ,  $C_p = -0.20$ ) relationship  
267 between the similarity of cluster importance for different OTUs assigned by the model  
268 and the phylogenetic similarities (Supplementary Figure 9). This relationship was  
269 negative, indicating that OTUs which are phylogenetically more closely related, are  
270 more likely to be associated with the same regions in the cytometric fingerprints.

271 The sensitivity of the model performance to the amount of data available for training  
272 was investigated for two OTUs (i.e. OTU1 and 6), by training models on randomly  
273 subsampled datasets that contained 20, 40, 60 or 80 % of the dataset (i.e. 34, 68, 101 or  
274 135 samples). For both OTUs and for both classification and regression, there was a  
275 strong reduction in performance at the lower sample sizes (learning curves in  
276 Supplementary Figure 10). Classification accuracy was reduced by 10 % and 5 %, for  
277 OTU1 and OTU6, respectively, for every 20 % reduction in dataset size. For the  
278 regression models, the  $R^2$ -values were halved when the model was trained on only 20  
279 % of the data as compared to when it was trained on 80 % of the data. For both of the  
280 OTUs the performance did not yet reach a plateau, suggesting that more data is required  
281 to improve model performances.

## 282 **Validation of the approach on external datasets**

283 To test whether the approach of our pipeline was applicable for monitoring of other  
284 (managed) microbial systems, the entire workflow was replicated on a three strain  
285 cytometric mock community from Cichocki *et al.* (2020) and a dataset of insular reactor  
286 communities from Liu *et al.*, (2019). Details about the datasets are provided in  
287 Supplementary Table 2.

288 For the mock community classifier AUC was  $0.96 \pm 0.07$  % on average and  $R^2$ -values  
289 were  $0.89 \pm 0.03$  on average (Figure 5). Since this was a simple mock community, we  
290 could validate that the clusters that were assigned a high importance by the model  
291 corresponded well to the regions where these taxa were found in the cytometric  
292 fingerprint (Supplementary Figure 11). For the reactor communities, AUC of the top 18  
293 OTUs were  $0.81 \pm 0.12$  on average. As for the aquaculture dataset, there were big  
294 differences in the model performances of individual OTUs. The range of performances  
295 was similar as for the aquaculture dataset, with an average  $R^2$  of  $0.33 \pm 0.27$ .

## 296 **Discussion**

297 The objectives of our study were: (1) to verify the taxonomic structure in flow  
298 cytometry fingerprints for our model system, *L. vannamei* larviculture rearing water  
299 communities, using cell sorting; (2) to further integrate 16S rRNA gene amplicon  
300 sequencing and flow cytometry data to develop a pipeline that allows to predict the  
301 presence/absence and the relative abundance of multiple individual bacterial taxa in  
302 mixed communities based on flow cytometry measurements (Figure 1); (3) to validate  
303 the approach of our pipeline on two independent datasets.

### 304 **Models can predict temporal abundance dynamics**

305 Substantial variation in model performances were observed for the individual OTUs, for  
306 both the aquaculture (Figure 3) and the validation datasets (Figure 5). For all OTUs the  
307 classifier accuracies were largely above the random guessing threshold of 50 %,  
308 indicating that the presence of all taxa could be predicted with moderate to high  
309 accuracy. In contrast, for the prediction of relative abundances, there were large  
310 differences in performance between OTUs. For the aquaculture dataset, predictions for  
311 OTUs with a high to intermediate  $R^2$  occasionally diverged from what would be  
312 expected based on interpolation of the time points for which 16S rRNA data was  
313 available, but the overall patterns of taxon presence and abundance were predicted well  
314 (Figure 4, Supplementary Figure 5, Supplementary Figure 6). Based on these results we  
315 conclude that the constructed models are suitable for monitoring dynamics over time,  
316 but that one should be more cautious when evaluating single snapshot samples. The  
317 number of required samples to predict reliable trends will be dependent on the taxa of  
318 interest and the dynamics of the system under study. We acknowledge that for a subset

319 of the investigated OTUs, accuracies were very low and predictions were not  
320 corresponding to the expected patterns (Supplementary Figure 7). Further  
321 improvement of prediction performances would greatly increase the applicability of the  
322 model. The required model accuracy and tolerated bias will be depend on the final  
323 context and application (e.g. research, environmental monitoring, pathogen monitoring,  
324 etc.). Aspects that can further improve model performances include increased dataset  
325 sizes for model training (Supplementary Figure 10), optimisation of acquisition settings  
326 and included fluorescence detectors (Rubbens, Props, Garcia-Timmermans, *et al.*, 2017)  
327 or the incorporation of different or additional stains in the cytometric measurements  
328 (Buysschaert *et al.*, 2016; Duquenoy *et al.*, 2020).

329 It should be noted that we do not expect the models to improve until the relative  
330 abundance of all taxa in a mixed community can be perfectly predicted, since flow  
331 cytometric data contain only information regarding a limited set of phenotypic  
332 properties. Studies using axenic culture data have observed that some combinations of  
333 taxa are difficult to distinguish (Rubbens, Props, Boon, *et al.*, 2017; Özel Duygan *et al.*,  
334 2020), and, studies using sorting and subsequent sequencing, typically also observe  
335 sub-communities that contain multiple taxa (Zimmermann *et al.*, 2016). Some taxa may  
336 be indistinguishable based on their cytometric fingerprints. Our results indicated that  
337 OTUs that are phylogenetically more closely related to each other, are more likely to be  
338 associated to the same regions in the cytometric fingerprints, and can therefore be  
339 harder to distinguish (Supplementary Figure 9). Additionally, some taxa are known to  
340 exhibit high phenotypic plasticity (Horvath *et al.*, 2011), which may make it difficult for  
341 the model to reliably associate a region in the cytometric fingerprint to such taxa. This  
342 implies that we can expect that for some taxa in a given environment it may be



343 impossible to construct performant models, despite the availability of large datasets  
344 and/or sorting data.

345 In contrast to previous developed methods to predict taxon abundances based on flow  
346 cytometry (Rubbens, Props, Boon, *et al.*, 2017; Özel Duygan *et al.*, 2020), the pipeline in  
347 our study does not rely on training models based on fingerprints of pure cultures. We  
348 have previously shown that the cytometric fingerprint of an individual taxon depends  
349 on the presence of other taxa in the community, and, that because the fingerprint of a  
350 single taxon in axenic culture and in mixed culture differs, relative abundance  
351 predictions that rely on axenic culture data may be unreliable (Heyse *et al.*, 2019).  
352 Hence, the applicability of pipelines that rely on FCM fingerprints of individual taxa for  
353 model training is limited to experimental setups where it is possible to determine the *in*  
354 *situ* phenotypic fingerprint of individual taxa (e.g. through physical separation of  
355 cultivated taxa, cell sorting, etc.). Using cell sorting we have shown that our pipeline is  
356 able to directly link taxonomic groups to clusters in the cytometric fingerprint of both  
357 mixed and synthetic communities (Supplementary Figure 11, Supplementary Figure 8).  
358 As a result, the currently proposed pipeline is suitable for studying both environmental  
359 and synthetic communities.

### 360 **Prospects for bacterial monitoring**

361 We used aquaculture as our model system since bacterial diseases are causing annual  
362 losses of billions of dollars worldwide in this sector (Stentiford *et al.*, 2017; Shinn *et al.*,  
363 2018). These disease outbreaks are not caused by the presence of a pathogen alone, but  
364 rather by complex changes in the microbial community structure (Lemire *et al.*, 2015;  
365 Dai *et al.*, 2020; Huang *et al.*, 2020; Infante-villamil *et al.*, 2020). Additionally, the onset  
366 of mortality typically occurs very fast (Lucas *et al.*, 2010; Heyse *et al.*, 2021). Fast and

367 high-throughput monitoring of bacterial community composition is a first step to  
368 mitigate the disease outbreaks, and is therefore a crucial aspect for microbial  
369 management. In practice, routine monitoring is mostly relying on (selective) plating.  
370 While these cultivation-based methods are simple and inexpensive, they remain slow  
371 (i.e. > 24h; Hallas and Monis, 2015; Rech *et al.*, 2018), and provide a biased view of  
372 bacterial abundance (Van Nevel *et al.*, 2017; Cheswick *et al.*, 2019) and community  
373 composition (Gensberger *et al.*, 2015; Sala-Comorera *et al.*, 2020).

374 The flow cytometric toolbox for monitoring environmental communities already  
375 contains algorithms for estimating community level diversity (Props *et al.*, 2016;  
376 Wanderley *et al.*, 2019), stability (Liu *et al.*, 2018) and turnover (Liu and Müller, 2020),  
377 as well as algorithms that allow to associate population dynamics with environmental  
378 or experimental parameters (Koch, Fetzer, Harms, and Müller, 2013) and pipelines that  
379 are designed for community-level classification into different categories (e.g.  
380 diseased/healthy, etc.) (Rubbens *et al.*, 2020). Standalone community level metrics such  
381 as diversity or stability may be difficult to interpret, and, therefore, to couple to specific  
382 management actions, because of the high bacterial heterogeneity and fast dynamics that  
383 are typically observed in aquaculture microbiomes (Schmidt *et al.*, 2017; Chun *et al.*,  
384 2018; Heyse *et al.*, 2021). Additionally, different pathogens or dysbiotic states may  
385 require a different treatment. The pipeline of our study allows to add an additional  
386 layer of taxonomic information to these metrics, which will increase the actionability of  
387 the farmers. Once the models have been constructed, predictions can be made for  
388 multiple taxa simultaneously allowing to monitor a large fraction of the bacterial  
389 community.

390 We have shown that the pipeline that was developed in this study can be extrapolated  
391 to other applications, including analysis of laboratory mock communities and mixed  
392 reactor communities (Figure 5). In our study, average model performances on the  
393 reactor communities were lower as compared to those of the taxa in the aquaculture  
394 communities. This can be due to the smaller dataset size (i.e. 43 samples as compared to  
395 169 for the aquaculture dataset), as this was shown to have a large influence on model  
396 performance (Supplementary Figure 10). Performances for the mock community  
397 strains was high, which can be expected due to the lower community complexity.

398 The main advantages of using flow cytometry for community composition monitoring  
399 lies in the speed (i.e. minutes) and the high potential for automation (Hammes *et al.*,  
400 2012; Arnoldini *et al.*, 2013), which enables monitoring with high temporal resolution.  
401 Additionally, the independence of cultivation is a great advantage for monitoring  
402 managed ecosystems, since man-induced stressors, such as disinfection, are known to  
403 induce VBNC-states (Chen *et al.*, 2020). Practical applications of the pipeline can include  
404 monitoring the efficacy of management strategies, follow-up disease outbreaks,  
405 monitoring the presence of probiotic strains, etc. We believe the pipeline that was  
406 developed in this study holds great potential to be integrated in routine monitoring  
407 schemes and early warning systems for biotechnological applications.

## 408 **Materials and Methods**

### 409 **Samples**

410 In this study, we used a combination of previous published flow cytometry and 16S  
411 rRNA gene amplicon data from a *L. vannamei* hatchery (Heyse et al., 2021) and new  
412 generated 16S rRNA gene amplicon data on sorted sub-communities of samples  
413 originating from this previous study. This dataset is referred to as the “aquaculture  
414 dataset”. Five gates were created for cell sorting (Supplementary Figure 1). The gates  
415 were chosen to cover the range of SYBR Green I fluorescence and side scatter that were  
416 observed in the dataset. The samples that were selected for sorting were chosen from  
417 three of the replicate tanks, over different days, in order to include communities with  
418 heterogeneous taxonomic compositions.

### 419 **Flow cytometry**

420 Samples for flow cytometry were fixed with 5  $\mu$ L glutaraldehyde (20 % vol/vol) per mL  
421 (Heyse *et al.*, 2021). Glutaraldehyde-fixed, SYBR Green I-stained community samples  
422 were measured with a FACSVerser flow cytometer and sorting was performed with a BD  
423 Influx v7 Sorter USB. The procedures for flow cytometric measurements, cell sorting  
424 and control samples accompanying these procedures are outlined in detail in  
425 Supplementary Materials and Methods.

### 426 **Illumina sequencing**

427 Sequencing of the V3-V4 region of the 16S rRNA gene amplicon sequencing was  
428 performed on an Illumina MiSeq. The DNA extraction protocols and details about the  
429 sequencing are outlined in Supplementary Materials and Methods.

## 430 **Validation datasets**

431 The applicability of the pipeline was verified on two datasets: a synthetic community  
432 and a mixed community. The synthetic community dataset contained samples of a three  
433 strain mock community (*Stenotrophomonas rhizophila* DSM 14405, *Kocuria rhizophila*  
434 DSM 348 and *Paenibacillus polymyxa* DSM 36). The reactor community dataset  
435 originated from the study of Liu *et al.* (2019). More information regarding the validation  
436 datasets, their processing and availability is provided in Supplementary Table 2.

## 437 **Data analysis**

### 438 **Flow cytometry analysis**

439 The flow cytometry data were imported in R (v3.6.3) (R Core Team, 2017) using the  
440 flowCore package (v1.52.1) (Hahne *et al.*, 2009). The data were transformed using the  
441 arcsine hyperbolic function, and the background of the fingerprints was removed by  
442 manually creating a gate on the primary fluorescent channels (Supplementary Figure  
443 12).

### 444 **16S rRNA gene amplicon sequencing analysis**

445 Raw sequencing reads from the previous study and raw sequencing reads generated in  
446 this study were processed together. Analysis was performed with the software package  
447 MOTHUR (v.1.42.3) (Schloss *et al.*, 2009). Contigs were created by merging paired-end  
448 reads based on the Phred quality score heuristic and they were aligned to the SILVA  
449 v123 database. Sequences that did not correspond to the V3-V4 region as well as  
450 sequences that contained ambiguous bases or more than 12 homopolymers, were  
451 removed. The aligned sequences were filtered and sequencing errors were removed

452 using the `pre.cluster` command. UCHIME was used to removed chimeras (Edgar *et al.*,  
453 2011) and the sequences were clustered in OTUs with 97 % similarity with the  
454 `cluster.split` command (average neighbour algorithm). OTUs were subsequently  
455 classified using the SILVA v123 database. The OTU table was further analysed in R  
456 (v3.6.3) (R Core Team, 2017). OTU abundances were rescaled by calculating their  
457 proportions and multiplying them by the minimum sample size present in the data set.  
458 Absolute taxon abundances are calculated by multiplication of relative abundances with  
459 total bacterial densities as determined through flow cytometry.

## 460 **Predictive models**

461 **FCM preprocessing.** The data is normalized to the [0,1] interval by dividing each  
462 parameter by the maximum SYBR Green I fluorescence channel (i.e. the targeted  
463 channel) intensity value over the data set. Next, the flow cytometry data were processed  
464 by applying a Gaussian mixture mask to the data that allows to classify each cell into  
465 one of the cell clusters that are detected in the dataset. For generating the mask, all  
466 samples are subsampled to the same number of cells per sample, in order to not bias  
467 model training towards a specific sample. Similar to the method of Ludwig *et al.* (2019),  
468 the Gaussian mixture model (GMM) was optimised based on the Bayesian information  
469 criterion (BIC) using PhenoGMM (Rubbens *et al.*, 2021, Supplementary Figure 13). This  
470 discretisation results in a 1D-vector for each sample that represents the number of cells  
471 present in each mixture. Unless indicated otherwise, the parameters that are included  
472 in the model are those that were optimised prior to measurement (i.e. FSC, SSC, FL1  
473 (527/32) and FL3 (700/54)). Finally, the mixture counts were converted to relative  
474 abundances per sample and transformed using a centered log ratio (*clr*) transformation

475 implemented in the compositions package (v. 2.0.0) (van den Boogaart and Tolosana-  
476 Delgado, 2008):

$$clr(x_i) = \ln\left(\frac{x_i}{\left(\prod_{j=1}^n x_j\right)^{1/n}}\right)$$

477 **Illumina preprocessing.** Taxa with low relative abundances are not expected to be  
478 detected through flow cytometry. Hammes *et al.*, (2008) determined a quantification  
479 limit for flow cytometry of  $10^2$  cells/mL. Since all samples were diluted 10 times, taxa  
480 with an absolute abundance below  $10^3$  cells/mL were not expected to be observable in  
481 the flow cytometry data. Therefore, in each sample, the relative abundance of OTUs with  
482 an absolute abundance lower than  $10^3$  cells/mL was set to zero.

483 **Model training and validation.** Models are trained for each OTU individually. To test  
484 the robustness of the pipeline, prediction performance was evaluated using  
485 independent validation sets with a nested cross-validation scheme (i.e. in the outer loop  
486 20 % of the data is held out for validation of the final model, in the inner loop 5-fold  
487 cross-validation is used for tuning and training of the models). This outer loop was  
488 repeated three times with different fold splits. The pipeline consists of a random forest  
489 classifier to predict presence or absence of the taxon of interest and a regression  
490 ensemble (i.e. combination of a gradient boost regression and a support vector  
491 regression with polynomial kernel) to predict the relative abundance of the taxon of  
492 interest. All models were implemented using the caret (v6.0.86) (Kuhn, 2008) and  
493 caretEnsemble (v2.0.1) (Deane-Mayer, Zachary A. Knowles, 2019) packages.

494 Sequencing survey data is typically zero-inflated (i.e. for each individual OTU, the OTU  
495 will be absent or have a very low relative abundance; Supplementary Figure 14A). Prior

496 to model training, samples were randomly combined *in silico* to increase the number of  
497 samples where the OTU was abundant (Supplementary Figure 14B and C). This  
498 increased model performances (Supplementary Figure 14D).

499 For the presence/absence classifier, samples with an OTU abundance lower than 1 %  
500 were labelled as “absent”, samples with an OTU abundance higher than 1 % were  
501 labelled as “present”. The reason why an arbitrary value of 1 % was chosen as a cut-off  
502 is that small differences in sequencing depth between samples may cause samples with  
503 similarly low relative abundances to be labelled differently (i.e. as absent or present). A  
504 random forest (RF) classifier was trained to separate both classes. Before training the  
505 classifier, the number of features was reduced using a recursive feature elimination  
506 strategy (*rfe* function in *caret*, 25 iterations). In short, the training data is split into a  
507 test- and trainset, the model is tuned on the train set and the features are ranked  
508 according to their importance. For each subset of the  $S_i$  most important features, the  
509 model is trained on the training set and predictions are made on the test set. This  
510 procedure was repeated 25 times and the average performance profile over the  
511 different subset sizes is calculated. The performances quickly reached a plateau. To  
512 avoid incorporation of redundant features, the features required to reach an accuracy  
513 with a maximal deviation of 0.5 % of the maximal accuracy were included  
514 (*pickSizeTolerance* function in *caret*). Inclusion feature selection improves the ability of  
515 the model to use features/clusters that are associated to the modelled taxon, and not on  
516 correlated clusters that may belong to other taxa (Supplementary Figure 15).

517 For predicting the relative abundances, models with unbound outcomes were used. To  
518 avoid the generation of predictions outside the [0,1] range, the logit transformation was



519 applied to map the relative abundances of the individual OTUs to values in the  $[-\text{Inf}, \text{Inf}]$   
520 range before training the regression models:

$$\text{logit}(x_i) = \ln\left(\frac{x_i}{1-x_i}\right)$$

521 Zero values were replaced by one tenth of the smallest non-zero abundance value. The  
522 final regression predictions were inversely transformed so the final predictions were  
523 bound to the  $[0,1]$  range. A linear regression ensemble was trained using a gradient  
524 boosting regression and a support vector regression with polynomial kernel. Because  
525 the regression models were marked by a high frequency of false positive predictions,  
526 the classifier was used to correct the regression output (i.e. predicted abundances of  
527 samples for which classifier predicted “absent” were set to zero, Supplementary Figure  
528 4).

529 Relative feature importance values of each model were stored to be compared either  
530 between taxa or to the sorting data. For the random forest classifier and gradient  
531 boosting regression, the mean squared error was calculated on the out-of-bag data for  
532 each tree, the values of the variable that was tested were randomly shuffled in the out-  
533 of-bag-sample and the mean squared error was calculated again. Differences in the mean  
534 squared error values were averaged and normalized. For the support vector regression,  
535 the relationship between each predictor and the outcome was evaluated by fitting a  
536 loess smoother. The  $R^2$  statistic was calculated for this model against the intercept only  
537 null model. This number was returned as a relative measure of variable importance.

538 **Data availability**

539 The entire data-analysis pipeline is available as an R Markdown document at  
540 [https://github.com/jeheyse/FCM-16S\\_PredictiveModelling](https://github.com/jeheyse/FCM-16S_PredictiveModelling). Raw FCM data and  
541 metadata for the aquaculture dataset are available on FlowRepository under accession  
542 ID FR-FCM-Z3CY. Raw sequence data of the bulk samples originated from a previous  
543 study (Heyse et al., 2021) and are available from the NCBI Sequence Read Archive (SRA)  
544 under accession ID PRJNA637486. Raw sequence data of the control samples, the sorted  
545 and the mock communities generated in this study are available from the NCBI  
546 Sequence Read Archive (SRA) under accession ID PRJNA691168.

## 547 **Acknowledgements**

548 The authors would like to thank Tim Lacoere for the design of the overview figure of  
549 this manuscript, for his advice during the DNA extractions and for operating the MinION  
550 and Frederiek-Maarten Kerckhof for sharing code to analyse the MinION reads. JH is  
551 supported by the Flemish Fund for Scientific research (FWO-Vlaanderen, project  
552 1S80618N). RP is supported by a postdoctoral fellowship of the Flemish Fund for  
553 Scientific research (FWO-Vlaanderen, project 1221020N). NB is supported by the  
554 Bijzonder Onderzoeksfonds (BOF) (BOF15/GOA/006) project. WW received funding  
555 from the Flemish Government under the “Onderzoeksprogramma Artificiële  
556 Intelligentie (AI) Vlaanderen” Programme.

## 557 **Contributions**

558 J.H., N.B. and R.P. conceived the study. J.H. and R.P. performed the flow cytometry  
559 measurements. F.S. and S.M. performed sorting analysis. J.H. performed DNA extractions  
560 and analysed the data. R.P., P.R., W.W. advised the data-analysis. R.P. and N.B.

561 supervised the findings of this work. J.H. wrote the paper. All authors contributed to the  
562 reviewing and editing of the manuscript. The manuscript was approved by all authors.

563 **Conflict of Interest**

564 The authors declare that there are no conflicts of interest.

## 565 References

- 566 Arnoldini, M., Heck, T., Blanco-fernández, A., and Hammes, F. (2013) Monitoring of Dynamic  
567 Microbiological Processes Using Real-Time Flow Cytometry. *PLoS One* **8**: 1–11.
- 568 Besmer, M.D. and Hammes, F. (2016) Short-term microbial dynamics in a drinking water plant treating  
569 groundwater with occasional high microbial loads. *Water Res.* **107**: 11–18.
- 570 van den Boogaart, K.G. and Tolosana-Delgado, R. (2008) “compositions”: A unified R package to analyze  
571 compositional data. *Comput. Geosci.* **34**: 320–338.
- 572 Bowman, J.S., Amaral-zettler, L.A., Rich, J.J., Luria, C.M., and Ducklow, H.W. (2017) Bacterial community  
573 segmentation facilitates the prediction of ecosystem function along the coast of the western  
574 Antarctic Peninsula. *ISME J.* **11**: 1460–1471.
- 575 Buyschaert, B., Byloos, B., Leys, N., Vn Houdt, R., and Boon, N. (2016) Reevaluating multicolor flow  
576 cytometry to assess microbial viability. *Appl. Microbiol. Biotechnol.* **100**: 9037–9051.
- 577 Buyschaert, B., Kerckhof, F., Vandamme, P., Baets, B. De, and Boon, N. (2018) Flow Cytometric  
578 Fingerprinting for Microbial Strain Discrimination and Physiological Characterization. *Cytom. Part A*  
579 **93**: 201–212.
- 580 Buyschaert, B., Vermijs, L., Naka, A., Boon, N., and Gusseme, B. De (2018) Online flow cytometric  
581 monitoring of microbial water quality in a full-scale water treatment plant. *npj Clean Water* **16**: 1–7.
- 582 Chen, S., Zeng, J., Wang, Y., Ye, C., Zhu, S., and Feng, L. (2020) Modelling the effect of  
583 chlorination/chloramination on induction of viable but non- culturable (VBNC) *Escherichia coli*.
- 584 Cheswick, R., Cartmell, E., Lee, S., Upton, A., Weir, P., Moore, G., et al. (2019) Comparing flow cytometry  
585 with culture-based methods for microbial monitoring and as a diagnostic tool for assessing drinking  
586 water treatment processes. *Environ. Int. J.* **130**: 104893.
- 587 Chun, S., Cui, Y., Ahn, C., and Oh, H. (2018) Improving water quality using settleable microalga *Ettlia sp.*  
588 and the bacterial community in freshwater recirculating aquaculture system of *Danio rerio*. *Water*  
589 *Res.* **135**: 112–121.
- 590 Cichocki, N., Hübschmann, T., Schattenberg, F., Kerckhof, F., Overmann, J., and Müller, S. (2020) Bacterial  
591 mock communities as standards for reproducible cytometric microbiome analysis. *Nat. Protoc.* **15**:  
592 2788–2812.
- 593 Dai, W., Sheng, Z., Chen, J., and Xiong, J. (2020) Shrimp disease progression increases the gut bacterial  
594 network complexity and abundances of keystone taxa. *Aquaculture* **517**: 1–8.
- 595 Deane-Mayer, Zachary A. Knowles, J.E. (2019) caretEnsemble: Ensembles of Caret Models.
- 596 Duquenoy, A., Bellais, S., Gasc, C., Schwintner, C., Dore, J., Thomas, V., and Thomas, V. (2020) Assessment  
597 of Gram- and Viability-Staining Methods for Quantifying Bacterial Community Dynamics Using Flow  
598 Cytometry. *Front. Microbiol.* **11**: 1–20.
- 599 Edgar, R.C., Haas, B.J., Clemente, J.C., Quince, C., and Knight, R. (2011) UCHIME improves sensitivity and  
600 speed of chimera detection. *Bioinformatics* **27**: 2194–2200.
- 601 Favere, J., Buyschaert, B., Boon, N., and Gusseme, B. De (2020) Online microbial fingerprinting for quality  
602 management of drinking water: Full-scale event detection. *Water Res.* **170**: 115353.
- 603 Ferrera, I., Aristegui, J., González, J.M., and Montero, M.F. (2015) Transient Changes in Bacterioplankton  
604 Communities Induced by the Submarine Volcanic Eruption of El Hierro (Canary Islands). *PLoS One*  
605 **10**: 1–16.
- 606 García, F.C., Alonso-sáez, L., Morán, X.A.G., and López-urrutia, Á. (2015) Seasonality in molecular and  
607 cytometric diversity of marine bacterioplankton: the re-shuffling of bacterial taxa by vertical  
608 mixing. *Environ. Microbiol.* **17**: 4133–4142.
- 609 Gensberger, E.T., Gossl, E.-M., Antonielli, L., Sessitsch, A., and Kostic, T. (2015) Effect of different  
610 heterotrophic plate count methods on the estimation of the composition of the culturable microbial  
611 community. *PeerJ* 1–14.
- 612 Giljan, G., Kamennaya, N.A., Otto, A., Becher, D., Ellrott, A., Meyer, V., et al. (2020) Bacterioplankton reveal  
613 years-long retention of Atlantic deep-ocean water by the Tropic Seamount. *Sci. Rep.* **10**: 1–11.
- 614 Haange, S., Jehmlich, N., Krügel, U., Hintschich, C., Wehrmann, D., Hankir, M., et al. (2020) Gastric bypass  
615 surgery in a rat model alters the community structure and functional composition of the intestinal  
616 microbiota independently of weight loss. *Microbiome* **8**: 1–17.
- 617 Hahne, F., LeMeur, N., Brinkman, R.R., Ellis, B., Haaland, P., Sarkar, D., et al. (2009) flowCore: a  
618 Bioconductor package for high throughput flow cytometry. *BMC Bioinformatics* **10**: 1–8.
- 619 Hallas, G. and Monis, P. (2015) Evaluation of heterotrophic plate and chromogenic agar colony counting  
620 in water quality laboratories. *MethodsX* **2**: 415–422.

- 621 Hammes, F., Berney, M., Wang, Y., Vital, M., and Egli, T. (2008) Flow-cytometric total bacterial cell counts  
622 as a descriptive microbiological parameter for drinking water treatment processes. *Water Res.* **42**:  
623 269–277.
- 624 Hammes, F., Broger, T., Weilenmann, H., Vital, M., Helbing, J., Bosshart, U., et al. (2012) Development and  
625 Laboratory-Scale Testing of a Fully Automated Online Flow Cytometer for Drinking Water Analysis.  
626 *Cytom. Part A* **81**: 508–516.
- 627 Heyse, J., Buysschaert, B., Props, R., Rubbens, P., Skirtach, A.G., Waegeman, W., and Boon, N. (2019)  
628 Coculturing Bacteria Leads to Reduced Phenotypic Heterogeneities. *Appl. Environ. Microbiol.* **85**: 1–  
629 13.
- 630 Heyse, J., Props, R., Kongnuan, P., Schryver, P. De, Rombaut, G., Defoirdt, T., and Boon, N. (2021) Rearing  
631 water microbiomes in white leg shrimp (*Litopenaeus vannamei*) larviculture assemble  
632 stochastically and are influenced by the microbiomes of live feed products. *Environ. Microbiol.* **23**:  
633 281–298.
- 634 Horvath, D.J., Li, B., Casper, T., Partida-sanchez, S., Hunstad, D.A., Hultgren, S.J., and Justice, S.S. (2011)  
635 Morphological plasticity promotes resistance to phagocyte killing of uropathogenic *Escherichia coli*.  
636 *Microbes Infect.* **13**: 426–437.
- 637 Huang, Z., Zeng, S., Xiong, J., Hou, D., Zhou, R., Xing, C., et al. (2020) Microecological Koch's postulates  
638 reveal that intestinal microbiota dysbiosis contributes to shrimp white feces syndrome. *Microbiome*  
639 **8**: 1–13.
- 640 Infante-villamil, S., Huerlimann, R., and Jerry, D.R. (2020) Microbiome diversity and dysbiosis in  
641 aquaculture. *Rev. Aquac.* 1–20.
- 642 Koch, C., Fetzer, I., Harms, H., and Muller, S. (2013) CHIC - An Automated Approach for the Detection of  
643 Dynamic Variations in Complex Microbial Communities. *Cytom. Part A* **83**: 561–657.
- 644 Koch, C., Fetzer, I., Harms, H., and Müller, S. (2013) CHIC-an automated approach for the detection of  
645 dynamic variations in complex microbial communities. *Cytom. Part A* **83**: 561–567.
- 646 Koch, C., Fetzer, I., Schmidt, T., Harms, H., and Müller, S. (2013) Monitoring functions in managed  
647 microbial systems by cytometric bar coding. *Environ. Sci. Technol.* **47**: 1753–1760.
- 648 Kuhn, M. (2008) Building Predictive Models in R Using the caret Package. *J. Stat. Softw.* **28**: 1–26.
- 649 Lambrecht, J., Cichocki, N., Schattenberg, F., Kleinstauber, S., Harms, H., Müller, S., and Sträuber, H. (2019)  
650 Key sub-community dynamics of medium-chain carboxylate production. *Microb. Cell Fact.* **18**: 1–17.
- 651 Lemire, A., Goudenège, D., Versigny, T., Petton, B., Calteau, A., Labreuche, Y., and Le Roux, F. (2015)  
652 Populations, not clones, are the unit of vibrio pathogenesis in naturally infected oysters. *ISME J.* **9**:  
653 1523–1531.
- 654 Liu, Z., Cichocki, N., Bonk, F., Günther, S., Schattenberg, F., Harms, H., et al. (2018) Ecological Stability  
655 Properties of Microbial Communities Assessed by Flow Cytometry. *mSphere* **3**: 1–13.
- 656 Liu, Z., Cichocki, N., Hübschmann, T., Süring, C., Dana, I., Sloan, W.T., et al. (2019) Neutral mechanisms and  
657 niche differentiation in steady- state insular microbial communities revealed by single cell analysis.  
658 *Environ. Microbiol.* **21**: 164–181.
- 659 Liu, Z. and Müller, S. (2020) Bacterial Community Diversity Dynamics Highlight Degrees of Nestedness  
660 and Turnover Patterns. *Cytom. Part A* **97**: 742–748.
- 661 Lucas, R., Courties, C., Herbland, A., Gouletquer, P., Marteau, A.L., and Lemonnier, H. (2010)  
662 Eutrophication in a tropical pond: Understanding the bacterioplankton and phytoplankton  
663 dynamics during a vibriosis outbreak using flow cytometric analyses. *Aquaculture* **310**: 112–121.
- 664 Ludwig, J., Höner, C., Liu, Z., Stadler, P.F., and Müller, S. (2019) flowEMMi: an automated model-based  
665 clustering tool for microbial cytometric data. *BMC Bioinformatics* **20**: 1–17.
- 666 Müller, S. (2007) Modes of cytometric bacterial DNA pattern: A tool for pursuing growth. *Cell Prolif.* **40**:  
667 621–639.
- 668 Narayana, S.K., Mallick, S., and Siegumfeldt, H. (2020) Bacterial Flow Cytometry and Imaging as Potential  
669 Process Monitoring Tools for Industrial Biotechnology. *Fermentation* **6**: 1–15.
- 670 Neumeyer, A., Hübschmann, T., Müller, S., and Frunzke, J. (2012) Monitoring of population dynamics of  
671 *Corynebacterium glutamicum* by multiparameter flow cytometry. *Microb. Biotechnol.* **6**: 157–167.
- 672 Van Nevel, S., Koetzsch, S., Proctor, C.R., Besmer, M.D., Prest, E.I., Vrouwenvelder, J.S., et al. (2017) Flow  
673 cytometric bacterial cell counts challenge conventional heterotrophic plate counts for routine  
674 microbiological drinking water monitoring. *Water Res.* **113**: 191–206.
- 675 Özel Duygan, B.D., Hadadi, N., Babu, A.F., Seyfried, M., and van der Meer, J.R. (2020) Rapid detection of  
676 microbiota cell type diversity using machine-learned classification of flow cytometry data. *Commun.*  
677 *Biol.* **3**: 1–13.
- 678 Props, R., Monsieurs, P., Mysara, M., Clement, L., and Boon, N. (2016) Measuring the biodiversity of  
679 microbial communities by flow cytometry. *Methods Ecol. Evol.* **7**: 1376–1385.

- 680 Props, R., Schmidt, M.L., Heyse, J., Vanderploeg, H.A., Boon, N., and Deneff, V.J. (2018) Flow cytometric  
681 monitoring of bacterioplankton phenotypic diversity predicts high population-specific feeding rates  
682 by invasive dreissenid mussels. *Environ. Microbiol.* **20**: 521–534.
- 683 R Core Team (2017) R: A Language and Environment for Statistical Computing. *R Found. Stat. Comput.*
- 684 Read, D.S., Gweon, H.S., Bowes, M.J., Newbold, L.K., Field, D., Bailey, M.J., and Griffiths, R.I. (2015)  
685 Catchment-scale biogeography of riverine bacterioplankton. *ISME J.* **9**: 516–526.
- 686 Rech, M.M., Swalla, B.M., and Dobranic, J.K. (2018) Evaluation of Legiolert for Quantification of Legionella  
687 pneumophila from Non-potable Water. *Curr. Microbiol.* **75**: 1282–1289.
- 688 Rubbens, P. and Props, R. (2021) Computational Analysis of Microbial Flow Cytometry Data. *mSystems* **6**:  
689 1–12.
- 690 Rubbens, P., Props, R., Boon, N., and Waegeman, W. (2017) Flow cytometric single-cell identification of  
691 populations in synthetic bacterial communities. *PLoS One* **12**: 1–19.
- 692 Rubbens, P., Props, R., Garcia-Timmermans, C., Boon, N., and Waegeman, W. (2017) Stripping flow  
693 cytometry: How many detectors do we need for bacterial identification? *Cytom. Part A* **91**: 1184–  
694 1191.
- 695 Rubbens, P., Props, R., Kerckhof, F.-M., Boon, N., and Waegeman, W. (2020) Cytometric fingerprints of gut  
696 microbiota predict Crohn's disease state. *ISME J.*
- 697 Rubbens, P., Props, R., Kerckhof, F.-M., Boon, N., and Waegeman, W. (2021) PhenoGMM: Gaussian Mixture  
698 Modeling of Cytometry Data Quantifies Changes in Microbial Community Structure. *mSphere* **6**: 1–  
699 15.
- 700 Rubbens, P., Schmidt, M.L., Props, R., Biddanda, B.A., Boon, N., Waegeman, W., and Deneff, V.J. (2019)  
701 Randomized Lasso Links Microbial Taxa with Aquatic Functional Groups Inferred from Flow  
702 Cytometry. *mSystems* **4**: 1–17.
- 703 Sala-Comorera, L., Caudet-Segarra, L., Galofré, B., Lucena, F., Blancha, A.R., and García-Aljaro, C. (2020)  
704 Unravelling the composition of tap and mineral water microbiota: divergences between next-  
705 generation sequencing techniques and culture-based methods. *Int. J. Food Microbiol.* **334**: 108850.
- 706 Salma, M., Rousseaux, S., Sequeira-Le Grand, A., and Alexandre, H. (2013) Cytofluorometric detection of  
707 wine lactic acid bacteria: application of malolactic fermentation to the monitoring. *Biotechnol.*  
708 *Methods* **40**: 63–73.
- 709 Santos, M., Peixoto, S., Pereira, J.L., Luís, A.T., Henriques, I., Gonçalves, F.J.M., et al. (2019) Using flow  
710 cytometry for bacterioplankton community analysis as a complementary tool to Water Framework  
711 Directive to signal putatively impacted sites. *Sci. Total Environ.* **695**: 133754.
- 712 Schloss, P.D., Westcott, S.L., Ryabin, T., Hall, J.R., Hartmann, M., Hollister, E.B., et al. (2009) Introducing  
713 mothur: Open-Source , Platform-Independent , Community-Supported Software for Describing and  
714 Comparing Microbial Communities. *Appl. Environ. Microbiol.* **75**: 7537–7541.
- 715 Schmidt, V., Gomez-Chiarri, M., Roy, C., Smith, K., and Amaral-Zettler, L. (2017) Subtle Microbiome  
716 Manipulation Using Probiotics Reduces Antibiotic-Associated Mortality in Fish. *mSystems* **2**: 1–13.
- 717 Shinn, A.P., Pratoomyot, J., Griffiths, D., Trong, T.Q., Vu, N.T., Jiravanichpaisal, P., and Briggs, M. (2018)  
718 Asian Shrimp Production and the Economic Costs of Disease. *Asian Fish. Sci.* **31**: 29–58.
- 719 Stentiford, G.D., Sritunyalucksana, K., Flegel, T.W., Bryony, A., Williams, P., Withyachumrarnkul, B., et al.  
720 (2017) New Paradigms to Help Solve the Global Aquaculture Disease Crisis. *PLoS Pathog.* **13**: 1–6.
- 721 Vogt, C., Laube, M., Harms, H., and Kleinstuber, S. (2009) Community dynamics within a bacterial  
722 consortium during growth on toluene under sulfate-reducing conditions. *FEMS Microbiol. Ecol.* **70**:  
723 586–596.
- 724 Wanderley, B.M.S., Araújo, D.S.A., Quiroga, M. V, Amado, A.M., Neto, A.D.D., Sarmiento, H., et al. (2019)  
725 flowDiv: a new pipeline for analyzing flow cytometric diversity. 1–10.
- 726 Wang, Y., Wang, K., Huang, L., Dong, P., Wang, S., Chen, H., and Lu, Z. (2020) Fine-scale succession patterns  
727 and assembly mechanisms of bacterial community of *Litopenaeus vannamei* larvae across the  
728 developmental cycle. *Microbiome* **8**: 1–16.
- 729 Zimmermann, J., Hübschmann, T., Schattenberg, F., Schumann, J., Durek, P., Riedel, R., et al. (2016) High-  
730 resolution microbiota flow cytometry reveals dynamic colitis-associated changes in fecal bacterial  
731 composition. *Eur. J. Immunol.* **46**: 1300–1303.
- 732



## 733 **Figure legends**

734 Figure 1 - Overview illustration of the workflow and application of the pipeline  
735 presented in this study. During the training stage, samples from the system under study  
736 are collected and analysed using both flow cytometry and 16S rRNA gene amplicon  
737 sequencing. For the 16S rRNA gene amplicon data, the reads are processed to calculate  
738 relative abundance profiles for each sample. The models are trained for each taxon  
739 individually. Therefore, the relative abundances of the taxa of interest are extracted  
740 which results in a single vector for each taxon. For flow cytometry, the single cell data  
741 are separated from the background signals by manually creating a gate on the primary  
742 fluorescent channels and subsequently discretised by applying a Gaussian Mixture  
743 mask, which assigns each cell to a specific cluster. This results in a data frame with the  
744 relative abundance for each cluster of the Gaussian Mixture in each sample. Two models  
745 are constructed for each taxon: an absence/presence classifier and a regression  
746 ensemble to predict the relative abundance of the taxon of interest. During the  
747 deployment stage, the system under study is sampled using flow cytometry, the trained  
748 models are used to predict the presence/absence and relative abundances of one or  
749 multiple taxa of interest.

750 Figure 2 – (A) Relative abundances of the sorted sub-communities (SC), based on the  
751 measurements of the Influx v7 Sorter. (B) Observed taxonomic richness in the sorted  
752 community and sub-communities. The values above the brackets indicate the p-values  
753 of a one-sided (lower) Wilcoxon rank sum test. Note that for sub-community 3 no p-  
754 value is supplied since this sub-community was sorted only once. (C) Upset graph  
755 illustrating intersections between the taxonomic composition of the sorted sub-  
756 communities (i.e. number of common OTUs). The upper bars illustrate the cumulative  
757 number of OTUs that are found in a sub-community (in case of a single dot) or shared  
758 between sub-communities (in case of two connected dots). Note that the number of  
759 sorted samples were not homogeneously distributed over the five sorting gates (i.e. SC3  
760 and 5 were sorted once and three times, respectively, while SC1, 2 and 4 were sorted  
761 15, 17 and 18 times, Supplementary Figure 2).

762 Figure 3 – Classifier accuracy (A) and AUC (B), and regression  $R^2$  (C) and MAE (D)  
763 values for the top 50 abundant OTUs from the aquaculture dataset. For the regression  
764 metrics ( $R^2$  and MAE) both the regression model outputs (in blue) and final pipeline  
765 outputs (i.e. after imposing the classifier predictions to the regression results, in green,  
766 visualised in Supplementary Figure 4) are illustrated. OTUs are ordered according to  
767 their final  $R^2$  values. The three dots for each model represent three repeated fold splits,  
768 the vertical line per OTU indicates the average performance of the replicates. The  
769 vertical line at 50 % in (A) and 0.5 in (B) indicates the random guessing threshold of a  
770 binary classifier.

771 Figure 4 - Predictions for OTU 1 (*Phaeodactylibacter* sp.;  $R^2 = 0.81$ ) from the  
772 aquaculture dataset. The five replicate shrimp cultivation tanks (“T1” to “T5”) were  
773 sampled at a resolution of 3 hours for flow cytometry and once per day for 16S rRNA  
774 gene sequencing. The presence and relative abundances for OTU1 on the time points for  
775 which no amplicon data were available were predicted in order to evaluate the ability of  
776 our approach to correctly capture dynamics of this taxon over time. The dark shades  
777 (“measured”) correspond to the values that were determined based on 16S rRNA  
778 sequencing. The lighter shades (“predicted”) correspond to time points for which only  
779 flow cytometry data was available and predictions were made using the models.  
780 Expected values can be estimated by interpolation of the measured samples (indicated  
781 with the lines between the measured samples). The reported values are averages of the  
782 two replicate measurements at each time point. (A) Predictions of the  
783 presence/absence classifier. (B) Predicted relative abundances. (C) Predicted absolute  
784 abundances, calculated by multiplying the predicted relative abundances by the total  
785 cell density as determined through flow cytometry.

786 Figure 5 – Model performances on the two validation sets. (A) Classifier AUC-values for  
787 the three strain mock community. (B)  $R^2$  values for the three strain mock community.  
788 (C) Classifier AUC-values for the top 18 OTUs of the reactor communities. (D)  $R^2$  values  
789 for the top 18 OTUs of the reactor communities. The three dots for each model  
790 represent three repeated fold splits, the vertical line per OTU indicates the average  
791 performance of the replicates. The vertical line at 0.5 in (A) and (C) indicate the random  
792 guessing threshold of a binary classifier.



## 793 **Supplementary Figures**

794 Supplementary Figure 1 – For the aquaculture dataset, cell sorting was performed on a  
795 different instrument (BD Influx v7 Sorter) as compared to the FCM measurements of  
796 community samples (BD FACSVerse). To be able to use both the community sample and  
797 the sorted sample data as a single dataset, a set of representative samples (i.e. samples  
798 originating from the replicate tanks and sampling days from which final samples for  
799 sorting were selected) was measured on both instruments and the gates that were used  
800 for sorting were manually recreated on the FACSVerse data. (A) Illustration of the five  
801 gates that were used to perform sorting on the Influx v7 Sorter. (B) Illustration of the  
802 manually recreated gates on samples that were measured on the FACSVerse. (C)  
803 Relationship between the sub-community (SC) densities in the gates drawn on data of  
804 the two instruments. The colour intensity in the first two panels is proportional to the  
805 log-scaled density of the events. Note that the colour scaling of figure A and B are  
806 independent. (Adj. R. Sq. = adjusted R-squared,  $C_p$  = Pearson correlation)

807 Supplementary Figure 2 – Community composition in samples from the aquaculture  
808 dataset. (A) Composition in the sorted samples obtained in this study. The upper title  
809 bars indicate which sub-community was sorted (i.e. “SC 1” to “SC 5”). The lower title  
810 bars indicate from which replicate tank (i.e. “T1” to “T5”) the community originated. (B)  
811 Composition in the non-sorted samples (data originating from the previous study,  
812 Heyse *et al.*, 2021). The OTUs belonging to the 15 most abundant genera are coloured,  
813 all other genera were labelled as “Other”. The legend on the bottom applies on both  
814 panel A and B.

815 Supplementary Figure 3 – Number of false positive (i.e. samples incorrectly predicted to  
816 be present) and false negative (i.e. samples incorrectly predicted to be absent) samples  
817 for the classifiers that were built for the top 50 OTUs of the aquaculture dataset. Note  
818 that the number of samples are reported and not the rate. The reported p-values are the  
819 results of two sided Wilcoxon rank sum tests. The three dots for each model represent  
820 three repeated fold splits, the vertical line per OTU indicates the average performance  
821 of the replicates.

822 Supplementary Figure 4 – The regression ensembles frequently predicted high relative  
823 abundances for samples where an OTU was absent or present in very low abundance.  
824 To improve prediction accuracy, the predictions of the classifier were superimposed on  
825 the regression predictions: i.e. the predicted relative abundances of samples that were  
826 classified as “absent” are set to zero, predictions of samples that were classified as  
827 “present” remain unchanged. (A) Hypothetical example to illustrate the corrections that  
828 were made using the classifier predictions. Lines in blue indicate samples for which the  
829 classifier predicted “absent”, and, thus, predicted relative abundances were set to zero.  
830 Lines in white indicate samples for which the classifier predicted “present”, and, thus,  
831 the predicted relative abundance remained unchanged. (B) Illustration of predicted  
832 relative abundances for OTU 1 (*Phaeodactylibacter* sp.) from the aquaculture dataset

833 before correction with the classifier predictions. (C) Illustration of final predicted  
834 relative abundances for OTU 1 after correction with the classifier predictions. (R. sq. =  
835 R-squared value).

836 Supplementary Figure 5 - Predictions for OTU2 (*Balneola* sp.;  $R^2 = 0.65$ ) from the  
837 aquaculture dataset. The five replicate shrimp cultivation tanks ("T1" to "T5") were  
838 sampled at a resolution of 3 hours for flow cytometry and once per day for 16S rRNA  
839 gene sequencing. The presence and relative abundances for OTU2 on the time points for  
840 which no amplicon data were available were predicted in order to evaluate the ability of  
841 our approach to correctly capture dynamics of this taxon over time. The dark shades  
842 ("measured") correspond to the values that were determined based on 16S rRNA  
843 sequencing. The lighter shades ("predicted") correspond to time points for which only  
844 flow cytometry data was available and predictions were made using the models.  
845 Expected values can be estimated by interpolation of the measured samples (indicated  
846 with the lines between the measured samples). The reported values are averages of the  
847 two replicate measurements at each time point. (A) Predictions of the  
848 presence/absence classifier. (B) Predicted relative abundances. (C) Predicted absolute  
849 abundances, calculated by multiplying the predicted relative abundances by the total  
850 cell density as determined through flow cytometry.

851 Supplementary Figure 6 - Predictions for OTU6 (*Marivita* sp.;  $R^2 = 0.19$ ) from the  
852 aquaculture dataset. The five replicate shrimp cultivation tanks ("T1" to "T5") were  
853 sampled at a resolution of 3 hours for flow cytometry and once per day for 16S rRNA  
854 gene sequencing. The presence and relative abundances for OTU6 on the time points for  
855 which no amplicon data were available were predicted in order to evaluate the ability of  
856 our approach to correctly capture dynamics of this taxon over time. The dark shades  
857 ("measured") correspond to the values that were determined based on 16S rRNA  
858 sequencing. The lighter shades ("predicted") correspond to time points for which only  
859 flow cytometry data was available and predictions were made using the models.  
860 Expected values can be estimated by interpolation of the measured samples (indicated  
861 with the lines between the measured samples). The reported values are averages of the  
862 two replicate measurements at each time point. (A) Predictions of the  
863 presence/absence classifier. (B) Predicted relative abundances. (C) Predicted absolute  
864 abundances, calculated by multiplying the predicted relative abundances by the total  
865 cell density as determined through flow cytometry.

866 Supplementary Figure 7 - Predictions for OTU13 (*Maritalea* sp.;  $R^2 = 0.03$ ) from the  
867 aquaculture dataset. The five replicate shrimp cultivation tanks ("T1" to "T5") were  
868 sampled at a resolution of 3 hours for flow cytometry and once per day for 16S rRNA  
869 gene sequencing. The presence and relative abundances for OTU13 on the time points  
870 for which no amplicon data were available were predicted in order to evaluate the  
871 ability of our approach to correctly capture dynamics of this taxon over time. The dark  
872 shades ("measured") correspond to the values that were determined based on 16S  
873 rRNA sequencing. The lighter shades ("predicted") correspond to time points for which

874 only flow cytometry data was available and predictions were made using the models.  
875 Expected values can be estimated by interpolation of the measured samples (indicated  
876 with the lines between the measured samples). The reported values are averages of the  
877 two replicate measurements at each time point. (A) Predictions of the  
878 presence/absence classifier. (B) Predicted relative abundances. (C) Predicted absolute  
879 abundances, calculated by multiplying the predicted relative abundances by the total  
880 cell density as determined through flow cytometry.

881 Supplementary Figure 8 – Relationship between cluster importances assigned by the  
882 models for the top 10 OTUs in the aquaculture dataset and location of the five sorting  
883 gates in which these OTUs were detected. The colors of the dots correspond to the  
884 cluster importances that were assigned by the model. Gates in which the OTU were  
885 detected in one or more sorted sub-communities at an abundance of 1 % or higher, are  
886 indicated in blue. OTUs for which no gates are marked in blue were not found  
887 abundantly in the sorted sub-communities. The OTUs are ordered according to their  $R^2$   
888 values ( $R^2_{OTU1} = 0.81$ ,  $R^2_{OTU2} = 0.65$ ,  $R^2_{OTU3} = 0.57$ ,  $R^2_{OTU4} = 0.49$ ,  $R^2_{OTU5} = 0.32$ ,  $R^2_{OTU6} =$   
889  $0.19$ ,  $R^2_{OTU7} = 0.10$ ,  $R^2_{OTU8} = 0.68$ ,  $R^2_{OTU9} = 0.29$ ,  $R^2_{OTU10} = 0.80$ ).

890 Supplementary Figure 9 – Relationship between phylogenetic distance and similarity of  
891 model feature importances between all top 50 OTUs from the aquaculture dataset,  
892 calculated using the Bray-Curtis dissimilarities. The shaded area represents the 95 %  
893 confidence interval around the ordinary least squares regression model ( $p < 2e-16$ ).  
894 (Adj. R. Sq. = adjusted R-squared,  $C_p$  = Pearson correlation).

895 Supplementary Figure 10 – Learning curves to evaluate the influence of the dataset size  
896 available for training on the prediction performances for the aquaculture dataset for  
897 two OTUs: OTU1 (A & C) and OTU6 (B & D). The three dots for each model represent  
898 three repeated fold splits, the vertical line per OTU indicates the average performance  
899 of the replicates. (20 % = 34 samples, 40 % = 68 samples, 60 % = 101 samples, 80 % =  
900 135 samples).

901 Supplementary Figure 11 – Correspondence of pure culture data with relative feature  
902 importance for the three strain mock community. The feature importances are averaged  
903 over the three repeats and folds. Pure culture data for *P. polymyxa* (A), *S. rhizophila* (B)  
904 and *K. rhizophila* (C). Relative cluster/feature importance of the classifier for *P.*  
905 *polymyxa* (D), *S. rhizophila* (E) and *K. rhizophila* (F). Relative cluster/feature importance  
906 regression ensemble for *P. polymyxa* (G), *S. rhizophila* (H) and *K. rhizophila* (I). Note that  
907 the different subplots have different colour scales.

908 Supplementary Figure 12 - Illustration of the cell gate applied on the inverse hyperbolic  
909 sine transformed aquaculture flow cytometry dataset. Cells are isolated from most (in-  
910 )organic and instrumental background by manual gating on the SYBR Green I  
911 fluorescence channel (533/30) and a red (> 670 nm) fluorescence channel. The colour  
912 intensity is proportional to the log-scaled density of the events.

913 Supplementary Figure 13 – Learning curves for the Gaussian mixture models used in  
914 this study, based on the Bayesian information criterion (BIC) (according to Rubbens *et*  
915 *al.*, 2021). The different colours indicate different restrictions on the covariance  
916 matrices, and are indicated with a three letter code: EII (equal volumes, equal shapes,  
917 no orientation because spherical), VII (variable volumes, equal shapes, no orientation  
918 because spherical), EEI (equal volumes, equal shapes, orientation along axis), VEI  
919 (variable volumes, equal shapes, orientation along axis), EEE (equal volumes, equal  
920 shapes, equal orientation), EVE (equal volumes, variable shapes, equal orientation), VEE  
921 (variable volumes, equal shapes, equal orientation), VVE (variable volumes, variable  
922 shapes, equal orientation), EEV (equal volumes, equal shapes, variable orientation), VEV  
923 (variable volumes, equal shapes, variable orientation), EVV (equal volumes, variable  
924 shapes, variable orientation), VVV (variable volumes, variable shapes, variable  
925 orientation), EVI (equal volumes, variable shapes, orientation along axis), VVI (variable  
926 volumes, variable shapes, orientation along axis). The model with the highest BIC is  
927 retained as the final model and is indicated with the black dot. (A) For the aquaculture  
928 dataset using the scatters and two fluorescence parameter (optimum: 80 clusters, VEV).  
929 (B) For the three strain mock community (optimum: 31 clusters, VVI). (C) For the  
930 reactor communities of Liu *et al.* (2019) (optimum: 41 clusters, VEV).

931 Supplementary Figure 14 – (A) Relative abundance distributions of the top 50 OTUs  
932 from the aquaculture dataset, illustrating the strong zero-inflation that is typically  
933 observed in community composition survey data. (B) Distribution of the relative  
934 abundances of a random strain (OTU3) prior to the generation of *in silico* data. (C)  
935 Distribution of the relative abundances of a strain after the generation of *in silico* data.  
936 (D) Illustration of the advantage of including *in silico* generated samples for the top 3  
937 OTUs from the aquaculture dataset. The three dots for each model represent three  
938 repeated fold splits and the vertical line indicates the average performance of the  
939 replicates.

940 Supplementary Figure 15 – Illustration of the added value of including a feature  
941 selection step in the pipeline for one of the taxa from the three strain mock community.  
942 (A) Pure culture data for *S. rhizophila*. (B) Relative cluster/feature importance for  
943 models that were trained without feature selection. (C) Relative cluster/feature  
944 importance for models that were trained with feature selection.

945 Supplementary Figure 16 – Relative abundances of the clusters that were detected in  
946 the microbial mock communities that were used to test for variability in flow cytometric  
947 measurements at the single-cell level, according to the recommendation of Cichocki *et*  
948 *al.* (2020). (A) Results for the replicates that were measured on the BD FACSVerse. (B)  
949 Results for the replicates that were measured on the BD Influx v7 Sorter USB. Note that  
950 the clusters of the two instrument are independent.

951 Supplementary Figure 17 – Community composition that was retrieved from the  
952 samples to evaluate the effect of glutaraldehyde in the 16S rRNA gene profile. Each test

953 sample was sequenced in duplicate. The OTUs belonging to the 16 genera with the  
954 highest overall abundance are coloured, all other genera are labelled as “Other”.

955 Supplementary Figure 18 – Overview of the samples that were included to verify  
956 extraction-induced bias. (A) Community composition that was retrieved from the  
957 dilution series of the ZymoBIOMICS Microbial Community Standard (Zymo Research,  
958 USA) and the blanks, extracted with two different DNA extraction protocols (i.e. “Zymo”  
959 and “Chelex”). All contaminating OTUs are indicated as ‘Other’. (B) Sample originating  
960 from cultivation tanks that was extracted using the two DNA extraction protocols. (C)  
961 Sample originating from the algal cultures that was extracted using the two DNA  
962 extraction protocols. (D) Sample originating from the *Artemia* storage tanks that was  
963 extracted using the two DNA extraction protocols.

964 Supplementary Figure 19 – Overview of the samples that were included to control for  
965 potential contamination in the sorted samples. (A) Number of reads in samples from the  
966 sampling campaign (“Samples”), the buffer in which the sorted cells were collected  
967 (“Sheath”) and the Chelex solution that was used to extract DNA from the sorted  
968 samples (“Chelex”). (B) Community composition that was retrieved from the Chelex  
969 solution that was used to extract DNA from the sorted samples. One sample was taken  
970 for each of the three days DNA extractions were performed. (C) Community  
971 composition that was retrieved from the buffer in which the sorted cells were collected.  
972 One sample was taken for each day the sorting was performed. The OTUs belonging to  
973 the 16 genera with the highest overall abundance are coloured, all other genera are  
974 labelled as “Other”.

## 975 **Supplementary Tables**

976 Supplementary Table 1 - P-values resulting from PERMANOVA analysis on the Bray-  
977 Curtis dissimilarities between the community compositions in the communities and  
978 sorted sub-communities. Note that sub-community 3 was not included in the analysis  
979 since this sub-community was sorted only once. (\* = For this combination it was not  
980 possible to perform PERMANOVA because the beta-dispersion of the groups was  
981 significantly differing.)

982 Supplementary Table 2 – Information regarding the validation datasets. Accession IDs  
983 provided for the data from the study of Liu et al., 2019 are originating from the original  
984 study. Optimisation curves for the number of clusters detected using PhenoGMM are  
985 provided in Supplementary Figure 13.

## training stage

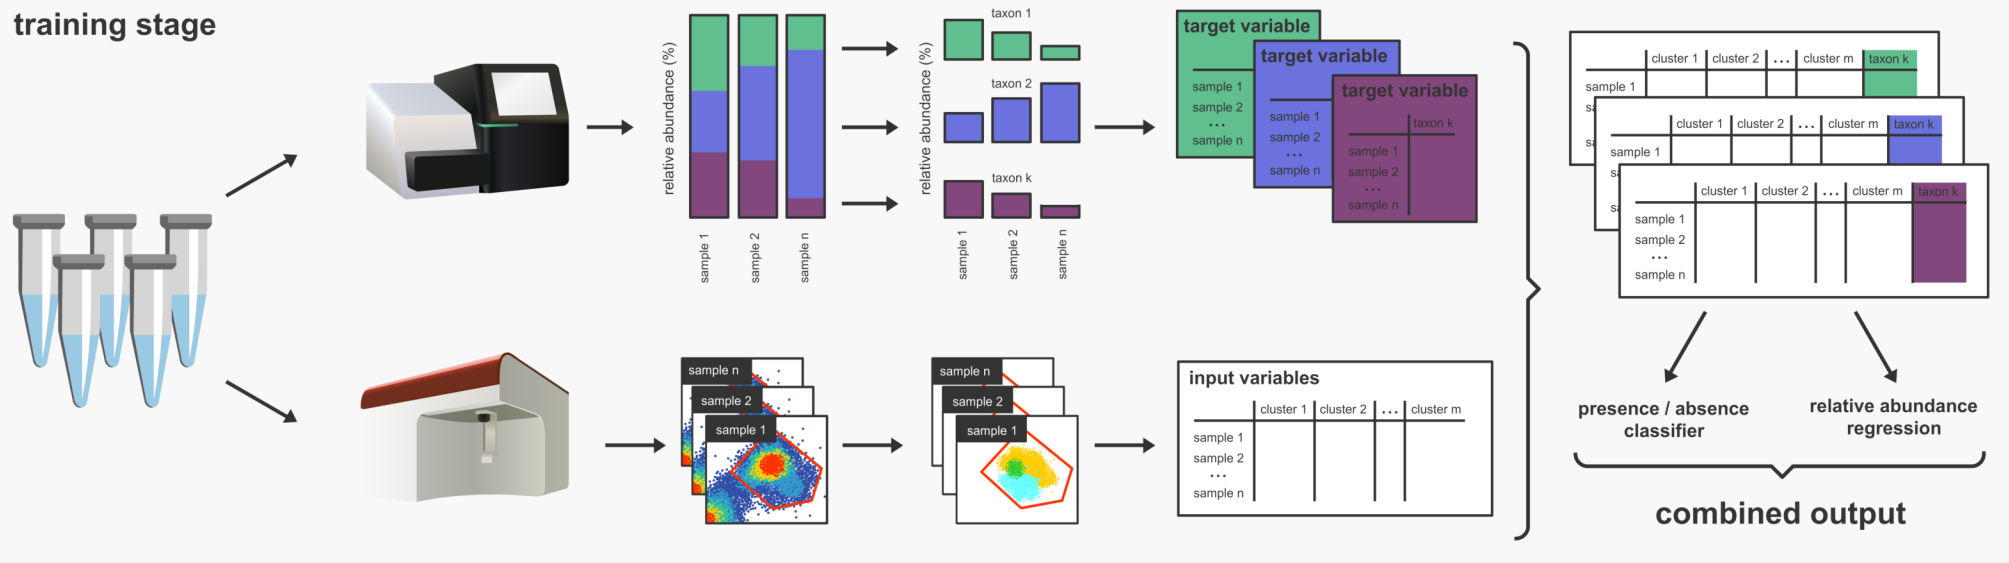

## deployment stage

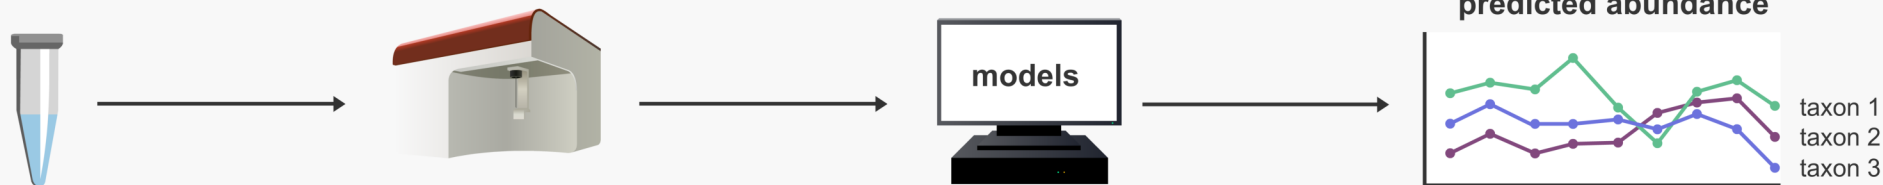



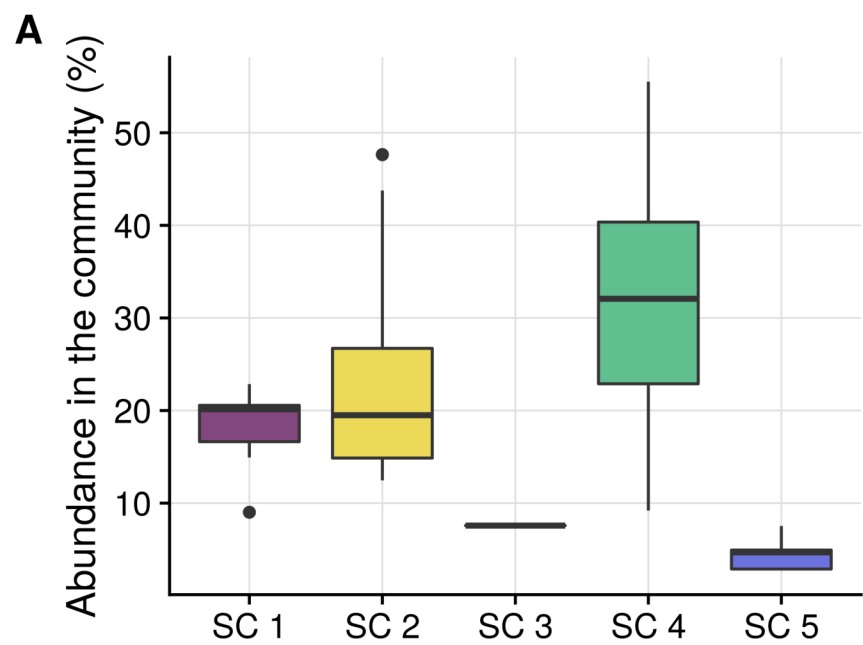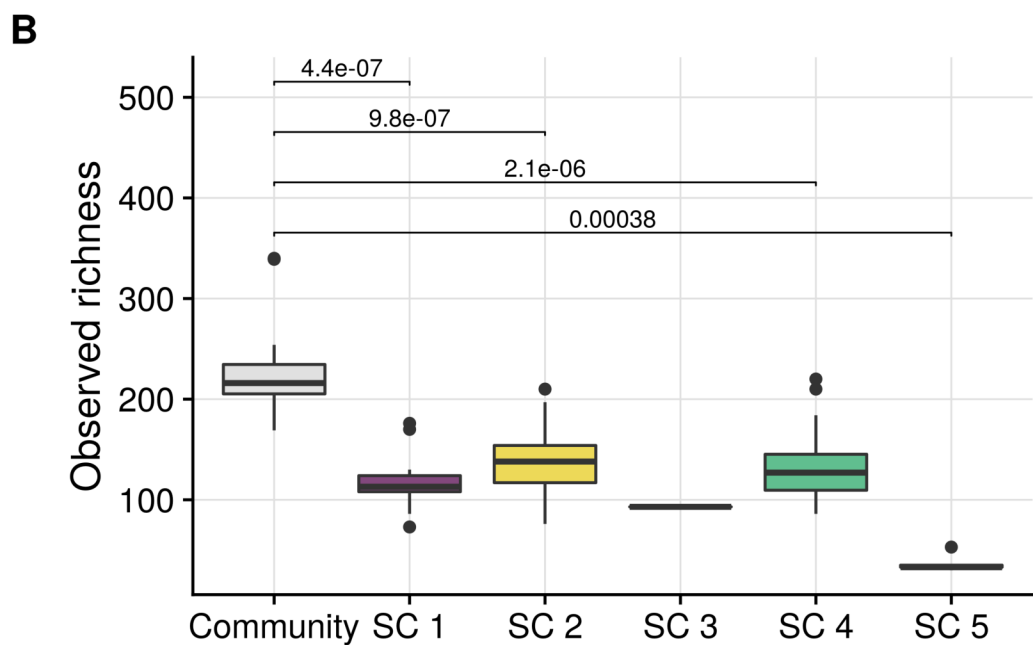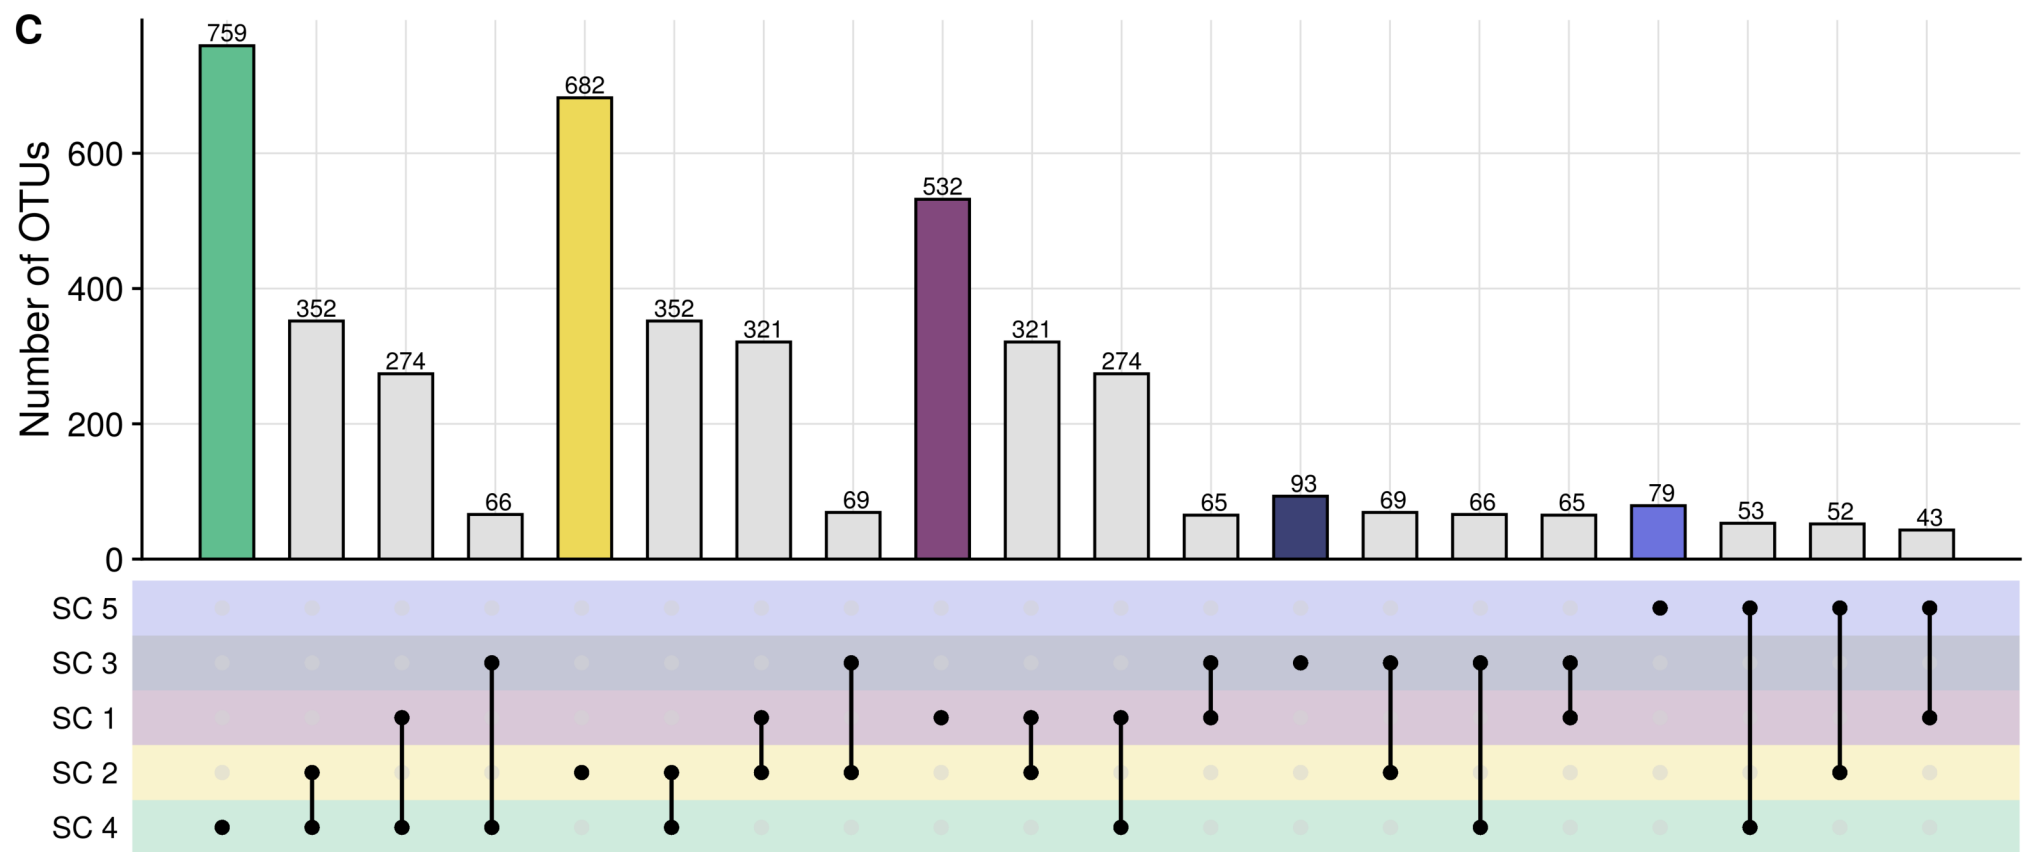

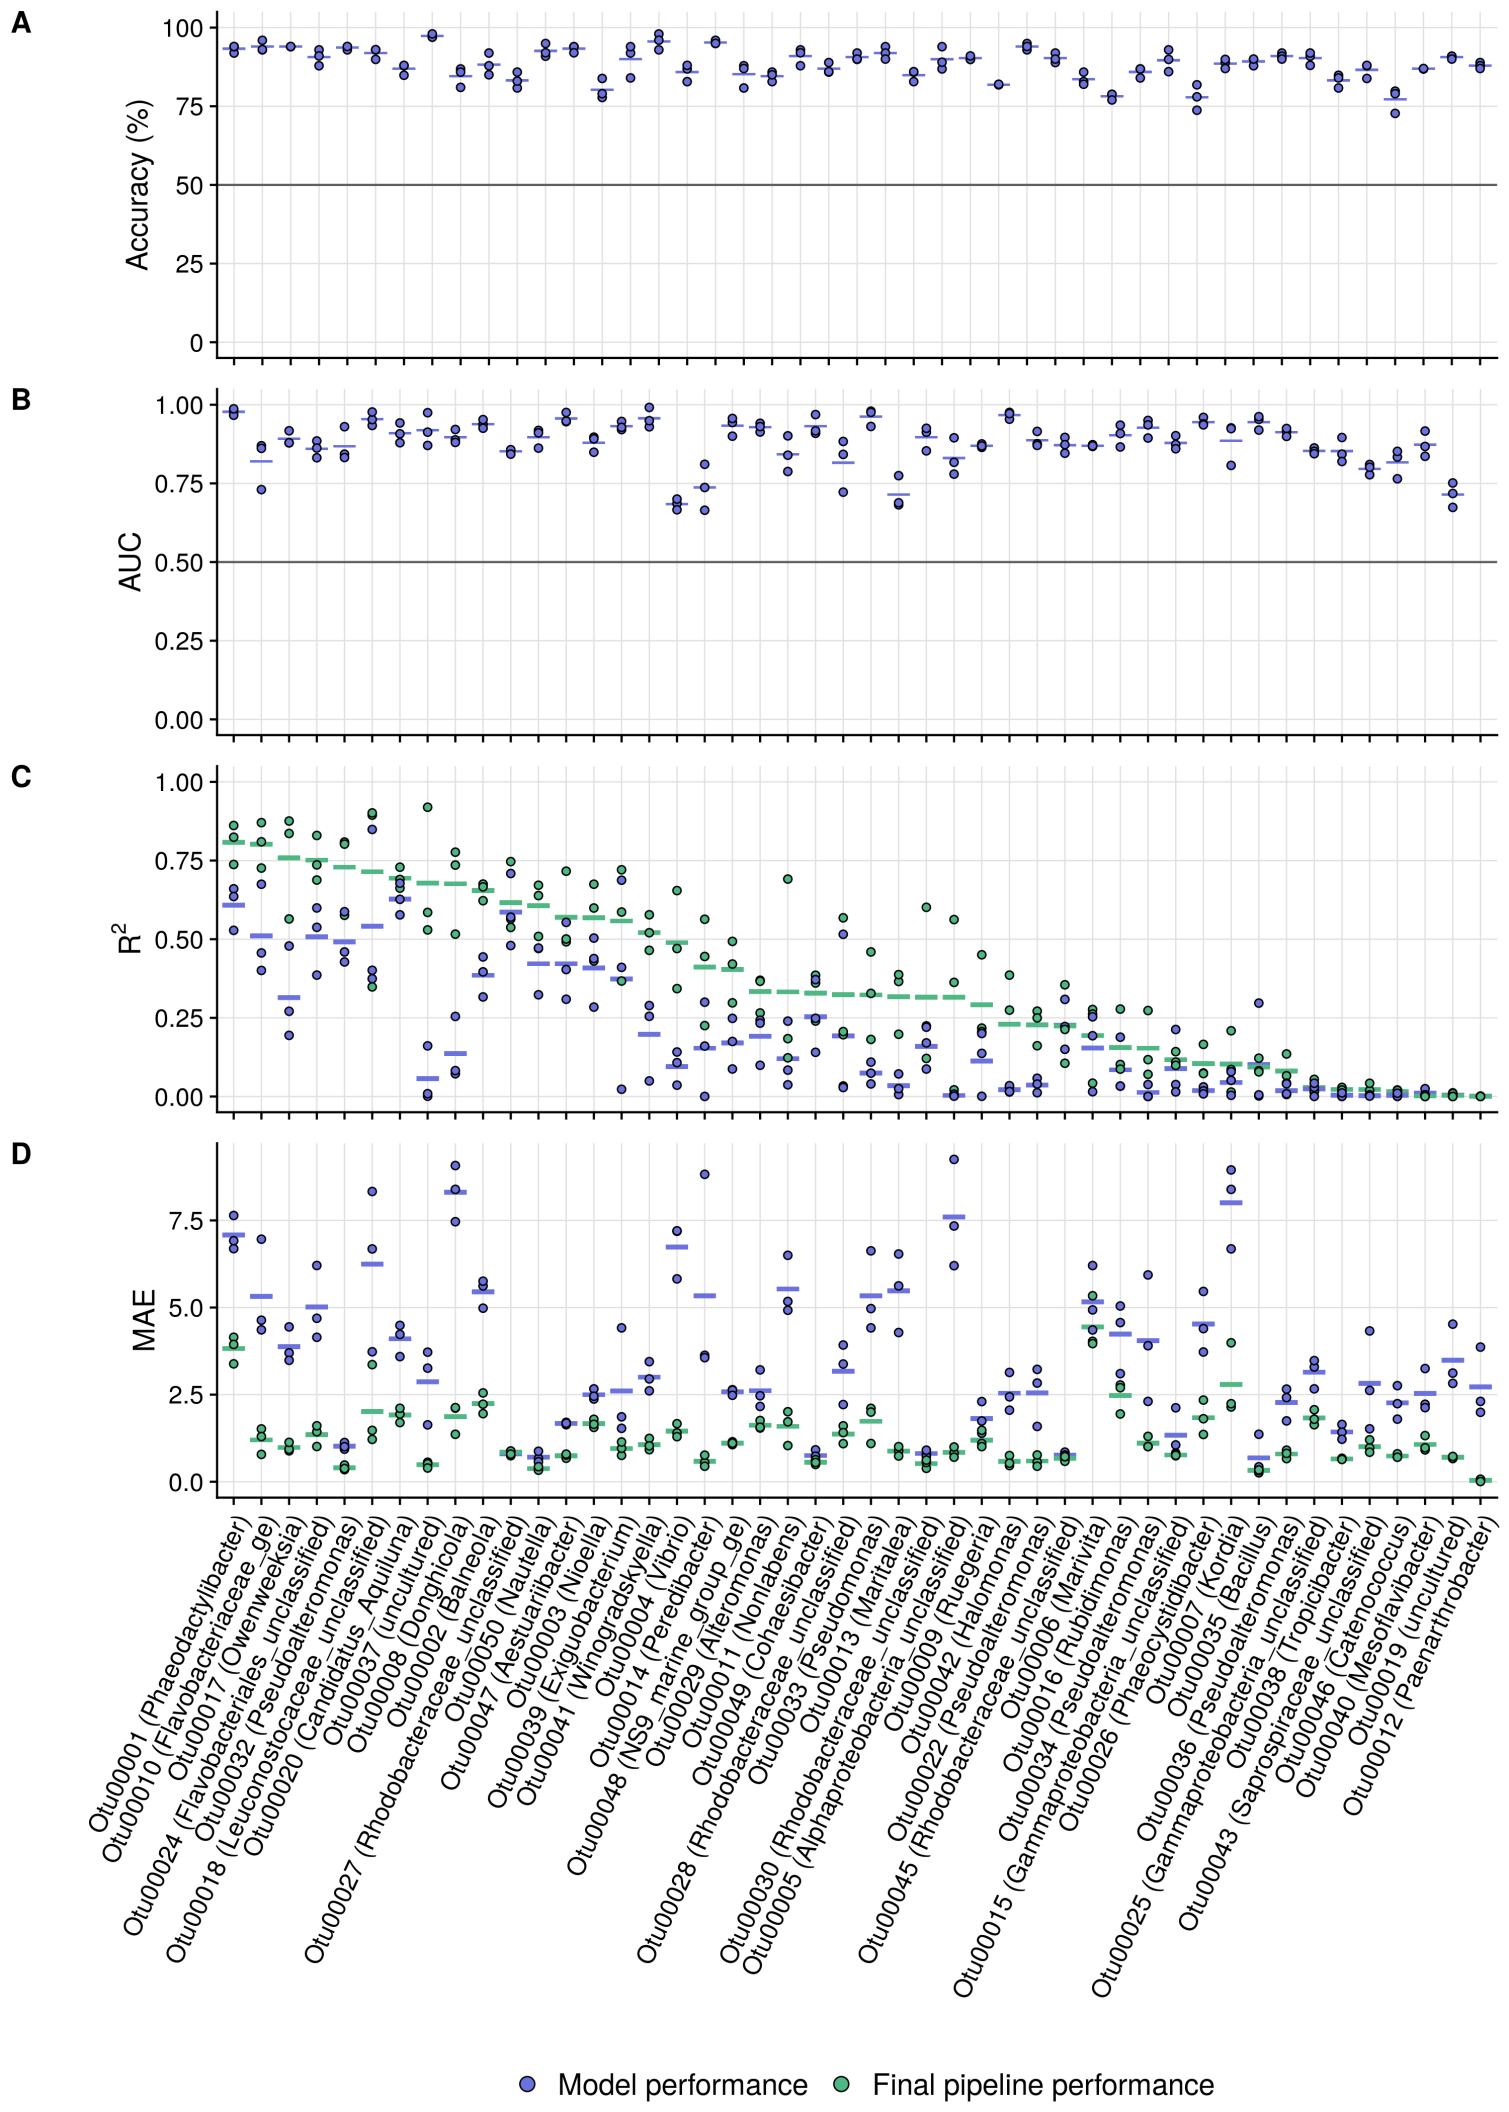



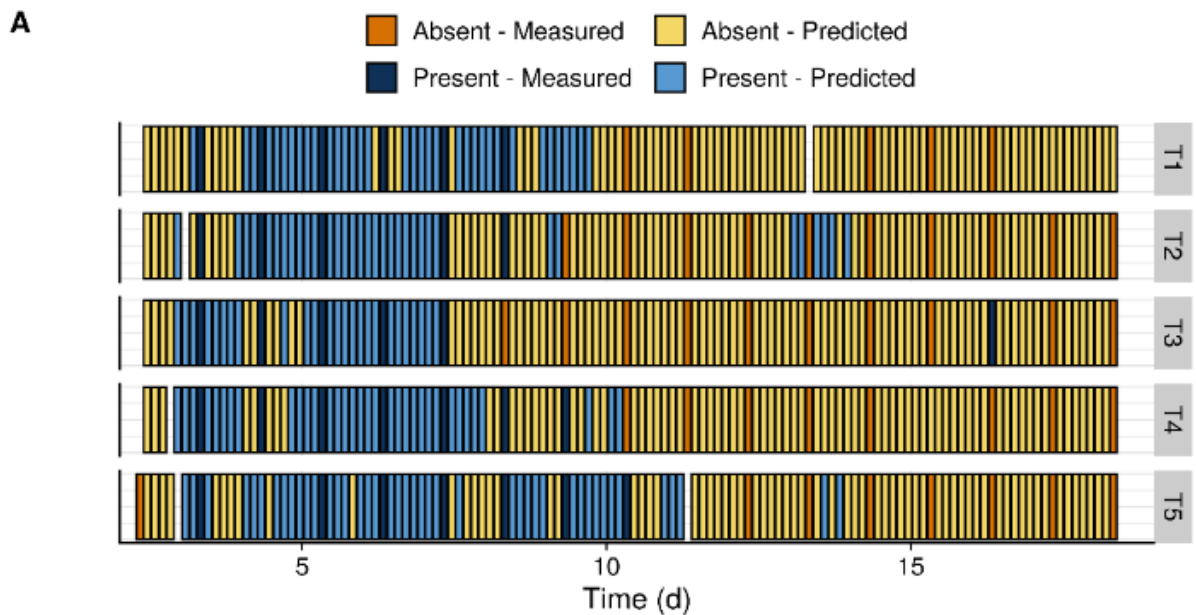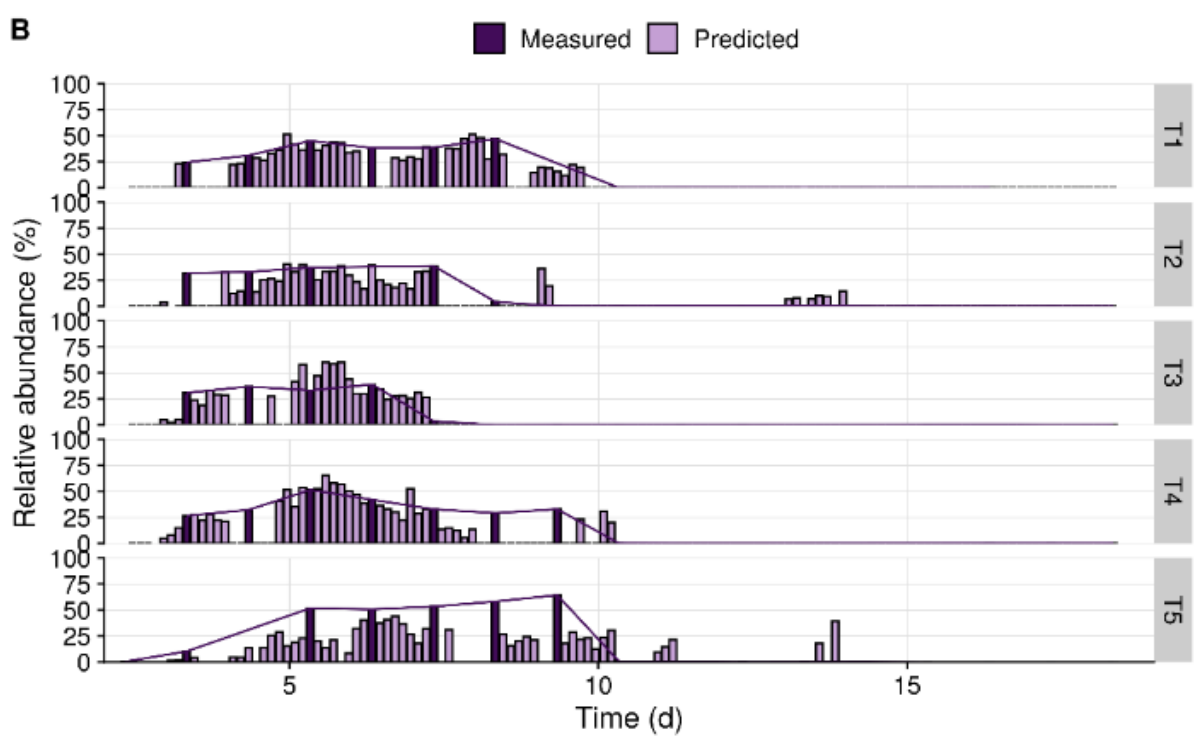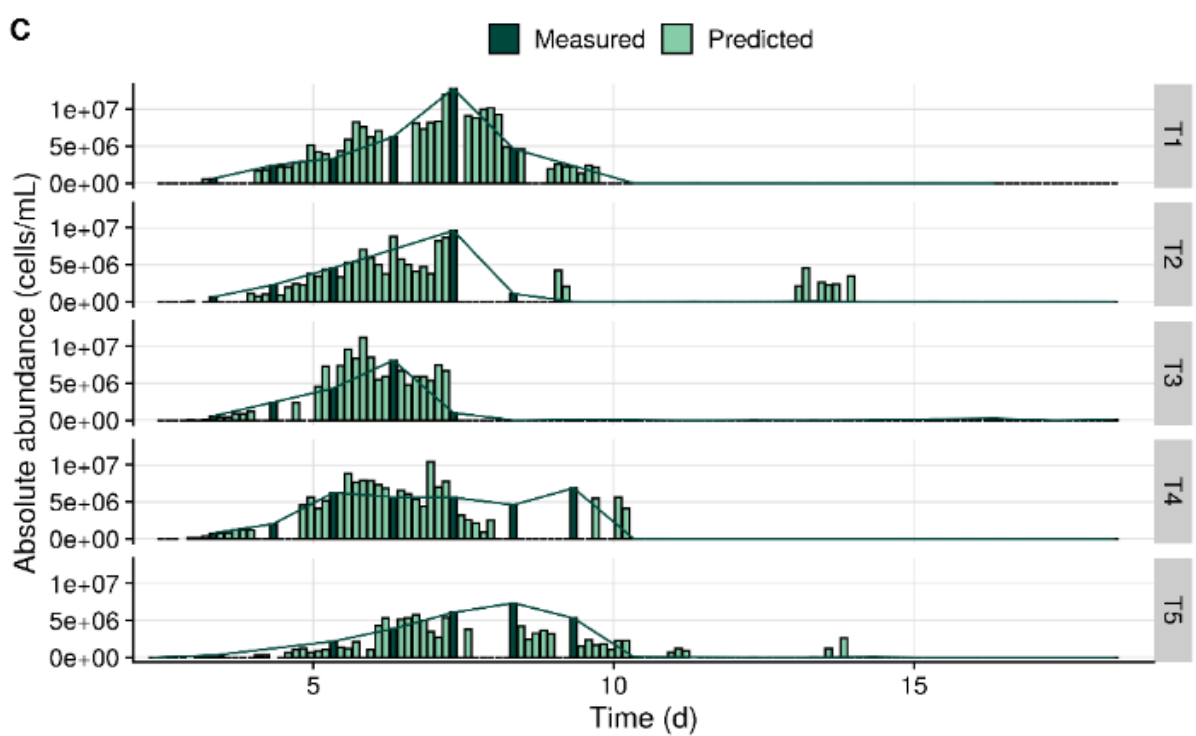

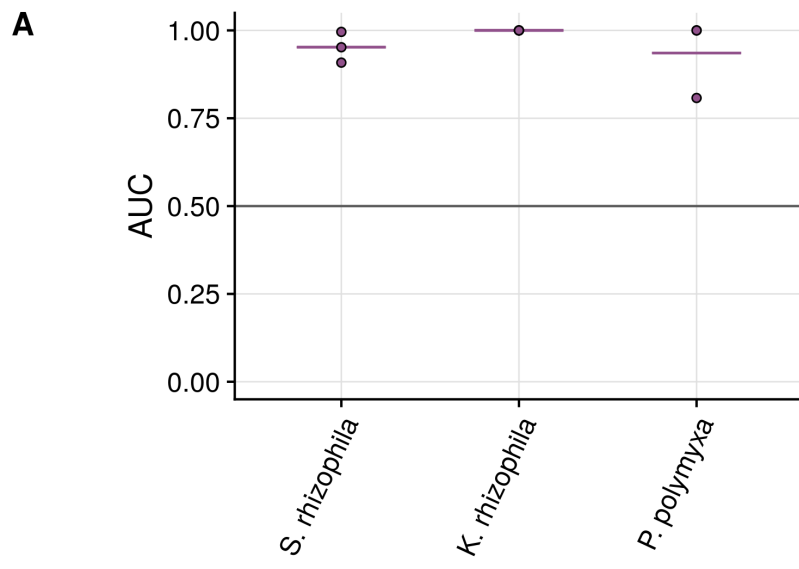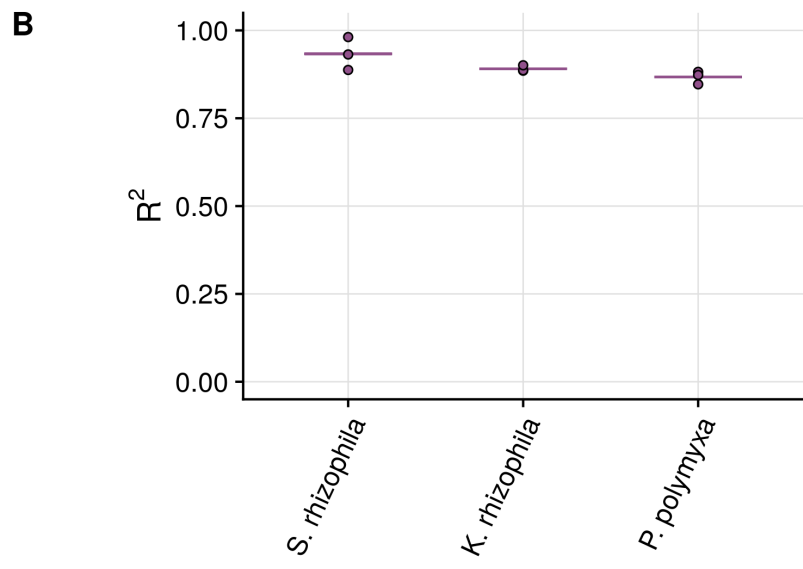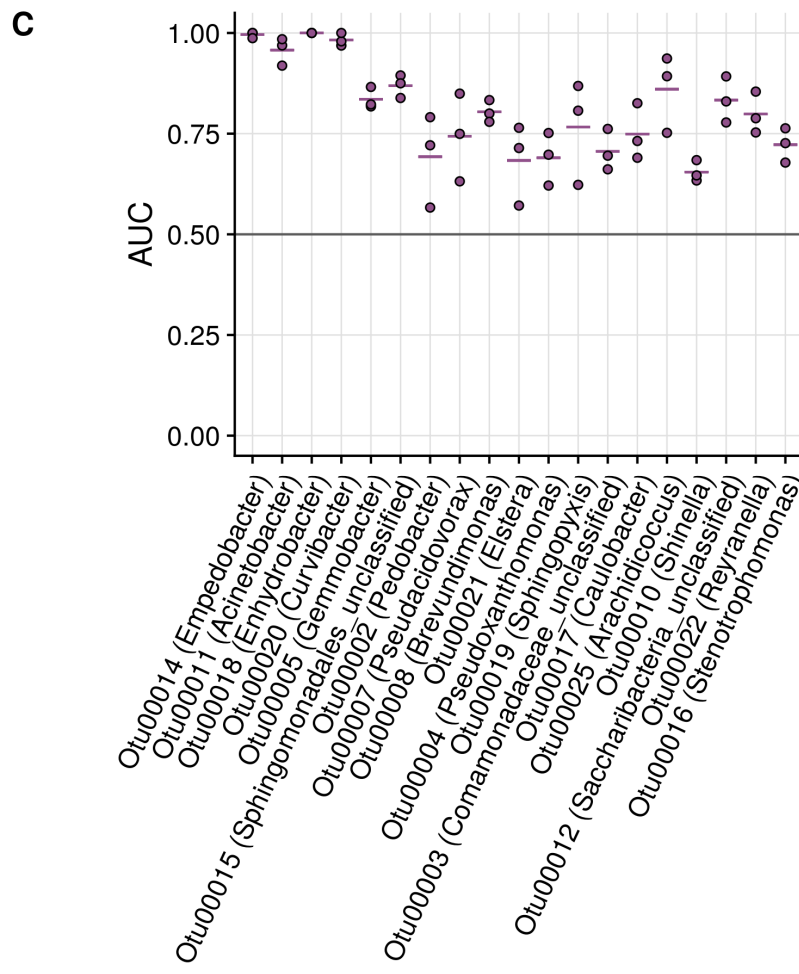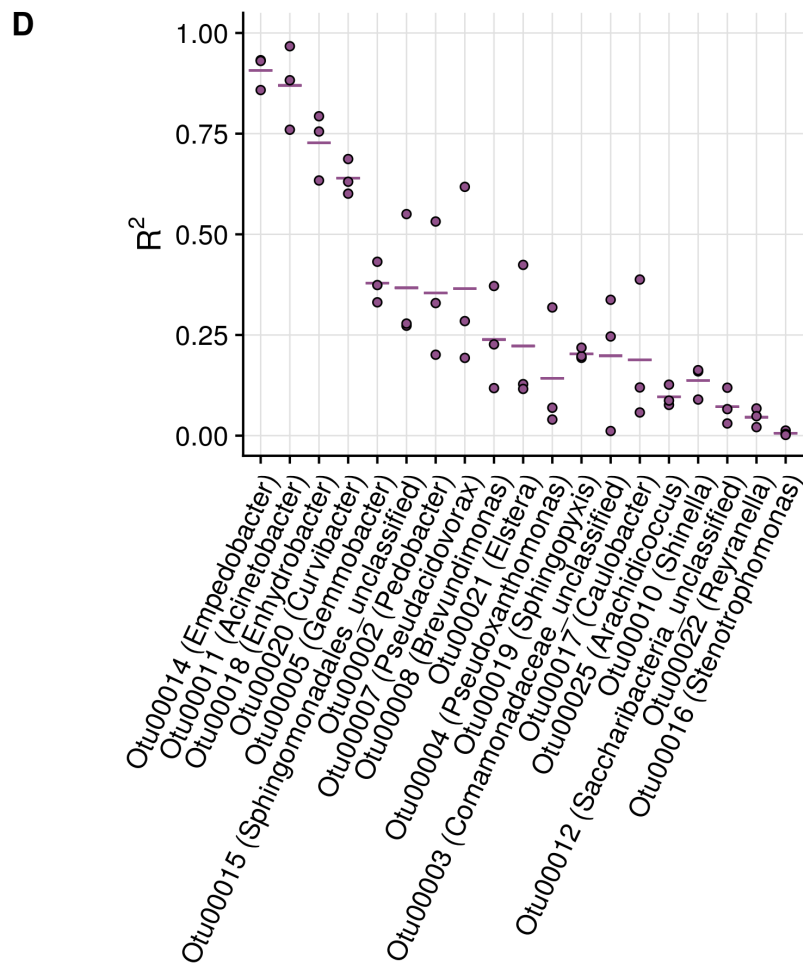

Source: http://biorxiv.org/content/10.1101/2021.05.05.442872v1.full.pdf
